1 **Bcr4 is a Chaperone for the Inner Rod Protein in the *Bordetella* Type III Secretion**  
2 **System**

3

4 Masataka Goto<sup>a</sup>, Akio Abe<sup>a</sup>, Tomoko Hanawa<sup>b</sup>, Masato Suzuki<sup>c</sup>, and Asaomi Kuwae<sup>a#</sup>

5

6 <sup>a</sup>Laboratory of Bacterial Infection, Graduate School of Infection Control Sciences, Kitasato  
7 University, Tokyo, Japan

8 <sup>b</sup>Department of Infectious Diseases, Kyorin University School of Medicine, Tokyo, Japan

9 <sup>c</sup>Antimicrobial Resistance Research Center, National Institute of Infectious Diseases, Tokyo,  
10 Japan

11

12

13 **Running Head:** Bcr4 is a Chaperone for Inner Rod in *Bordetella* T3SS

14

15 **#Address Correspondence to:** Asaomi Kuwae, [kuwae@lisci.kitasato-u.ac.jp](mailto:kuwae@lisci.kitasato-u.ac.jp)

16

17

18

19

20

21 **Abstract**

22 *Bordetella bronchiseptica* injects virulence proteins called effectors into host cells via a  
23 type III secretion system (T3SS) conserved among many Gram-negative bacteria. Small  
24 proteins called chaperones are required for stabilizing some T3SS components or  
25 localizing them to the T3SS machinery. In a previous study, we identified a chaperone-like  
26 protein named Bcr4 that regulates T3SS activity in *B. bronchiseptica*. Bcr4 does not show  
27 strong sequence similarity to well-studied T3SS proteins of other bacteria, and its function  
28 remains to be elucidated. Here, we investigated the mechanism by which Bcr4 controls  
29 T3SS activity. A pull-down assay revealed that Bcr4 interacts with Bscl, based on its  
30 homology to other bacterial proteins, to be an inner rod protein of the T3SS machinery. An  
31 additional pull-down assay using truncated Bcr4 derivatives and secretion profiles of *B.*  
32 *bronchiseptica* producing truncated Bcr4 derivatives showed that the Bcr4 C-terminal  
33 region is necessary for the interaction with Bscl and activation of the T3SS. Moreover, the  
34 deletion of Bscl abolished the secretion of type III secreted proteins from *B. bronchiseptica*  
35 and the translocation of a cytotoxic effector into cultured mammalian cells. Finally, we  
36 showed that Bscl is unstable in the absence of Bcr4. These results suggest that Bcr4  
37 supports the construction of the T3SS machinery by stabilizing Bscl. This is the first  
38 demonstration of a chaperone for the T3SS inner rod protein among the virulence bacteria  
39 possessing the T3SS.

40



## 42 **Importance**

43       The type III secretion system (T3SS) is a needle-like complex that projects outward from  
44 bacterial cells. *Bordetella bronchiseptica* uses the T3SS to inject virulence proteins into  
45 host cells. Our previous study reported that a protein named Bcr4 is essential for the  
46 secretion of virulence proteins from *B. bronchiseptica* bacterial cells and delivery through  
47 the T3SS. Because other bacteria lack a Bcr4 homologue, the function of Bcr4 has not  
48 been elucidated. In this study, we discovered that Bcr4 interacts with Bscl, a component of  
49 the T3SS machinery. We showed that a *B. bronchiseptica* Bscl-deficient strain was unable  
50 to secrete type III secreted proteins. Furthermore, in a *B. bronchiseptica* strain that  
51 overproduces T3SS component proteins, Bcr4 is required to maintain Bscl in bacterial cells.  
52 These results suggest that Bcr4 stabilizes Bscl to allow construction of the T3SS in *B.*  
53 *bronchiseptica*.

54

55

56

57

58

59

60

61

62

63

## 64 **Introduction**

65 The genus *Bordetella* consists of Gram-negative bacteria that infect the respiratory tracts  
66 of mammals including humans. *Bordetella pertussis* causes a severe coughing attack  
67 called whooping cough in humans (1, 2). *Bordetella bronchiseptica* causes atrophic rhinitis  
68 in pigs and kennel cough in dogs (1, 2). These *Bordetella* spp. harbor a virulence factor  
69 secretion apparatus called the type III secretion system (T3SS).

70 The T3SS consists of a basal body that penetrates the inner and outer membranes of the  
71 bacteria and a needle structure that protrudes outside the bacteria, and is conserved in  
72 many Gram-negative bacteria such as *Yersinia*, *Salmonella*, and *Pseudomonas*. *B.*  
73 *bronchiseptica* uses the T3SS to inject virulence factors, called effectors, into host cells to  
74 disrupt the physiological functions of host cells (3). Once the basal body and the export  
75 apparatus of the T3SS are completed, the type III secreted proteins are secreted in a fixed  
76 order. First, the components (Table S1) of the needle structure (SctF) and the inner rod  
77 (SctI) that ties the needle structure to the basal body are secreted. After the needle is  
78 completed, translocators (SctE and SctB) are secreted, which form small pores in the host  
79 cell membrane to create a pathway for effectors. Finally, the effectors translocate into the  
80 host cell via the T3SS (4, 5). In *B. bronchiseptica*, BopB (SctE) (6), BopD (SctB) (7), and  
81 Bsp22 (SctA) (8) function as translocators (Table S1), while BteA (also referred to as BopC)  
82 (9, 10), BopN (11, 12), and BspR (also referred to as BtrA) (13, 14) function as effectors.  
83 Bsp22 is located at the tip of the needle and bridges the needle to the pore-forming factors

84 embedded in the plasma membrane (15). BteA has been shown to cause  
85 membrane-disrupting cytotoxicity in mammalian cells (10). BspR is a regulator that  
86 represses transcription of the *bteA* gene and genes on the *bsc* locus (Fig. S1), where genes  
87 encoding type III secreted proteins and components of T3SS are located (14, 16).  
88 According to secondary structure prediction—e.g., the predicted positions of helix, and the  
89 overall structure of the operon—the BscF and BscI of *B. bronchiseptica* correspond to  
90 *Yersinia* needle YscF (SctF) and inner rod YscI (SctI), respectively (Table S1).

91 In addition, many type III secreted proteins have unique chaperones that are involved in  
92 stabilizing the substrate and preventing premature polymerization of the substrate in the  
93 bacterial cytosol, and then in efficiently transporting the substrate to the T3SS machinery  
94 (17-20). For example, PscE and PscG function as chaperones of the needle PscF (SctF) in  
95 *Pseudomonas* (Table S1). These chaperones stabilize PscF in the bacterial cytosol and are  
96 involved in PscF secretion through the T3SS (21). In bacteria such as *Yersinia* and  
97 *Pseudomonas*, an inner rod chaperone is thought to exist, because the inner rod is  
98 secreted out of the bacterial cell and polymerized (22, 23). However, a chaperone for the  
99 inner rod has not been reported.

100 So far, a chaperone-like protein called Bcr4 has been identified in *B. bronchiseptica* (24).  
101 *Bordetella* Bcr4 is highly conserved among *B. pertussis*, *B. parapertussis*, and *B.*  
102 *bronchiseptica* (Fig. S2). In this study, we attempted to identify factors that interact with  
103 Bcr4 in order to investigate how Bcr4 is involved in the T3SS regulation.

## 104 **Results**

### 105 **Bcr4 binds to Bscl, an inner rod protein of the *Bordetella* type III secretion system.**

106 The results of a previous study suggested that Bcr4 is a chaperone for components of the  
107 type III secretion system (T3SS) (24). T3SS chaperones are known to be involved in  
108 substrate stability and efficient transport of substrates to the T3SS machinery (17, 19, 20).  
109 In addition, it is generally known that the genes of these chaperones are localized adjacent  
110 to genes encoding their substrates (25). On the *B. bronchiseptica* S798 chromosome, the  
111 genes encoding BcrH2, Bscl, BscJ, and BscK are located in the vicinity of the *bcr4* gene  
112 (Fig. 1A), and these proteins are predicted to function as a translocator chaperone, inner  
113 rod (SctI), inner membrane ring (SctJ), and ATPase cofactor (SctK), respectively (Table S1)  
114 (5, 26). To test whether Bcr4 binds to Bscl, BscJ or BscK, we added *E. coli* lysates  
115 containing the V5-tagged target proteins (Bscl-V5, BscJ-V5 or BscK-V5) to Strep-Tactin  
116 beads loaded with the purified Strep-tagged Bcr4 (Bcr4-Strep), and then performed the  
117 pull-down assay. The supernatant fraction (Sup) and pellet fraction (Pellet) samples were  
118 prepared, separated by SDS-PAGE, and subjected to Western blotting with anti-V5  
119 antibody (Fig. 1B). When the beads were washed with TBS, the V5 signal of the Bscl-V5  
120 pellet sample was detected in the beads loaded with Bcr4, but not in the unloaded beads  
121 (Fig. 1B). The V5 signals of the BscK-V5 and BscJ-V5 pellet samples were detected in both  
122 the Bcr4-loaded beads and the unloaded beads when washed with TBS, and not detected  
123 when washed with TBS containing 0.1% Triton X-100 (Fig. 1B). These results suggest that

124 Bcr4 binds to Bscl, an inner rod protein of the *Bordetella* T3SS.

125 Next, to confirm that Bcr4 binds to Bscl, a pull-down assay was performed by adding *E.*  
126 *coli* lysate containing V5-tagged Bcr4 (Bcr4-V5) to Strep-Tactin beads with the purified  
127 Strep-tagged Bscl (Bscl-Strep) or BteA N-terminal 1–312 amino acids region  
128 (BteA-N-Strep). BteA is a protein secreted from the type III secretion system and interacts  
129 with its cognate chaperone BtcA through the N-terminal (9). As a result, the V5 signal was  
130 detected in the pellet sample of the Bscl-Strep, but was hardly detected in that of the  
131 BteA-N-Strep (Fig. 1C). These results strongly suggested that Bcr4 binds to Bscl.

132

### 133 **The C-terminal region of Bcr4 is required for the binding of Bcr4 to Bscl.**

134 Next, to investigate the Bcr4 region responsible for the binding to Bscl, we  
135 produced Strep-tagged full-length Bcr4 (Bcr4-FL-Strep), Bcr4 lacking amino acids region  
136 58–109 (Bcr4 $\Delta$ 58-109-Strep), and Bcr4 lacking amino acids region 110–173  
137 (Bcr4 $\Delta$ 110-173-Strep) in *E. coli* (Fig. 2A). A pull-down assay was performed by adding *E.*  
138 *coli* lysate containing V5-tagged Bscl (Bscl-V5) to Strep-Tactin beads with the purified  
139 Bcr4-FL-Strep, Bcr4 $\Delta$ 58-109-Strep, or Bcr4 $\Delta$ 110-173-Strep. The Sup and Pellet samples  
140 were then prepared, separated by SDS-PAGE, and subjected to Western blotting using  
141 anti-V5 antibody (Fig. 2B). As a result, the V5 signal was detected in the pellet sample of  
142 Bcr4-FL-Strep, but not in those of Bcr4 $\Delta$ 58-109-Strep and Bcr4 $\Delta$ 110-173-Strep. Although it  
143 is still unknown which region of Bcr4 directly interacts with Bscl, our results strongly



144 suggest that both the Bcr4-58-109 and Bcr4-110-173 regions are required for the  
145 interaction.

146

147 **The C-terminal region of Bcr4 is required for T3SS activity.**

148 The results in Figure 2 suggest that the C-terminal region of Bcr4 is required for binding  
149 to BscI. Therefore, we introduced plasmids encoding the full-length FLAG-tagged Bcr4  
150 (Bcr4-FL-FLAG), Bcr4 with the 5 C-terminal amino acids deleted (Bcr4 $\Delta$ 169-173-FLAG),  
151 Bcr4 with the 10 C-terminal amino acids deleted (Bcr4 $\Delta$ 164-173-FLAG), and Bcr4 with the  
152 15 C-terminal amino acids deleted (Bcr4 $\Delta$ 159-173-FLAG) (Fig. 3 A) into a Bcr4-deficient  
153 strain ( $\Delta bcr4$ ) ( $\Delta bcr4+bcr4$ -FL-FLAG,  $\Delta bcr4+bcr4\Delta$ 169-173-FLAG,  
154  $\Delta bcr4+bcr4\Delta$ 164-173-FLAG and  $\Delta bcr4+bcr4\Delta$ 159-173-FLAG, respectively). Whole cell  
155 lysates (WCL) and culture supernatant fraction (CS) samples were prepared from these  
156 strains and separated by SDS-PAGE. Western blottings were then carried out using  
157 antibodies against Bcr4, FLAG, BteA (an effector and a type III secreted protein), BopD  
158 (SctB, a translocator and a type III secreted protein) or RpoB (an internal control of WCL)  
159 (Fig. 3B). Since the antibody against Bcr4 was generated using its 18 C-terminal amino  
160 acids (amino acids (aa) 156–173) as the antigen peptide, we considered that it may not  
161 recognize the Bcr4 partial deletion mutant proteins used in this experiment. Therefore, we  
162 also performed Western blotting using anti-FLAG antibody (Fig. 3B). As a result, when  
163 anti-Bcr4 antibody was used against the WCL samples, signals were detected in the

164 wild-type,  $\Delta bcr4+bcr4$ -FL-FLAG and  $\Delta bcr4+bcr4 \Delta 169-173$ -FLAG, but almost no signals  
165 were detected in  $\Delta bcr4+bcr4 \Delta 164-173$ -FLAG and  $\Delta bcr4+bcr4 \Delta 159-173$ -FLAG (Fig. 3B).  
166 On the other hand, when anti-FLAG antibody was used, signals were detected in  
167  $\Delta bcr4+bcr4 \Delta 164-173$ -FLAG and  $\Delta bcr4+bcr4 \Delta 159-173$ -FLAG (Fig. 3B). These results  
168 confirmed that the Bcr4 partial deletion mutant proteins were produced in the  $\Delta bcr4$  strain.  
169 When anti-BteA or anti-BopD antibodies were used against the CS samples, signals were  
170 detected in the wild-type,  $\Delta bcr4+bcr4$ -FL-FLAG,  $\Delta bcr4+bcr4 \Delta 169-173$ -FLAG and  
171  $\Delta bcr4+bcr4 \Delta 164-173$ -FLAG, respectively, but not in  $\Delta bcr4$  or  $\Delta bcr4+bcr4 \Delta 159-173$ -FLAG  
172 (Fig. 3B). We attempted to create *B. bronchiseptica* strains that produce shorter Bcr4, e.g.  
173 amino acid regions 1-57, 58-109, and 110-173, however, those truncated Bcr4 were  
174 produced at very low levels (data not shown). Therefore, we were unable to evaluate  
175 whether or not these truncated proteins were functional in *B. bronchiseptica*. We then  
176 infected L2 cells (a rat lung epithelial cell line) with the wild-type,  $\Delta bcr4$ ,  
177  $\Delta bcr4+bcr4$ -FL-FLAG,  $\Delta bcr4+bcr4 \Delta 169-173$ -FLAG,  $\Delta bcr4+bcr4 \Delta 164-173$ -FLAG or  
178  $\Delta bcr4+bcr4 \Delta 159-173$ -FLAG strain at a multiplicity of infection (MOI) of 50 for 1 h and  
179 measured the amounts of LDH released into the culture medium as an index of cytotoxicity.  
180 As a result, LDH was detected in the medium of cells infected with  $\Delta bcr4+bcr4$ -FL-FLAG,  
181  $\Delta bcr4+bcr4 \Delta 169-173$ -FLAG or  $\Delta bcr4+bcr4 \Delta 164-173$ -FLAG, but not in the medium of cells  
182 infected with  $\Delta bcr4+bcr4 \Delta 159-173$ -FLAG (Fig. 3C). These results suggest that the region  
183 required for the T3SS function is located in the 159–163 amino acids region of Bcr4.

184

185 **Bscl is required for the function of the T3SS in *B. bronchiseptica*.**

186 Bscl is a homologue of Yscl, an inner rod (SctI) of the *Yersinia* T3SS, and Yscl is  
187 essential for the function of the T3SS (22). To confirm that Bscl is required for the function  
188 of the *B. bronchiseptica* T3SS, the *B. bronchiseptica* S798 wild-type, Bscl-deficient strain  
189 ( $\Delta bscl$ ), Bscl-complemented strain ( $\Delta bscl+bscl$ ), and BscN-deficient strain ( $\Delta bscN$ ) were  
190 cultured in SS medium. BscN is a protein predicted to function as an ATPase (SctN) and is  
191 required for the T3SS function in *Bordetella bronchiseptica* (Table S1) (6, 27). We used the  
192  $\Delta bscN$  as a T3SS-deficient strain. WCL and CS samples were prepared, and these  
193 samples were separated by SDS-PAGE and analyzed by Western blotting using antibodies  
194 against Bscl, BteA, BopD, Bsp22 (SctA, a translocator and a component of the filament-like  
195 structure; Fig. 7) or FHA (filamentous hemagglutinin, an adhesion factor) (Fig. 4A). As  
196 expected, the FHA signals were detected in the WCL and CS samples of all strains used  
197 here (Fig. 4A). In contrast, no signals of Bscl were detected in the WCL samples of all  
198 strains used here (Fig. 4A). The Bscl signal was detected in the CS of  $\Delta bscl+bscl$ , and a  
199 faint Bscl signal was detected in the CS of the wild-type (Fig. 4A). In order to examine  
200 whether the signal we obtained around 20 kDa in the western blot using anti-Bscl antibody  
201 in Fig. 4A was specific or nonspecific, we prepared the supernatant fraction from  $\Delta bsp22$   
202 strain. As a result, the signal disappeared in the supernatant fraction of the  $\Delta bsp22$  strain  
203 (Fig. S3), suggesting that the signal around 20 kDa obtained in the western blot was a

204 nonspecific interaction between anti-Bscl antibody and an excess amount of Bsp22 on the  
205 membrane. The BteA, BopD and Bsp22 signals were detected in the CS of the wild-type  
206 and  $\Delta bscI+bscI$ , but not in those of  $\Delta bscI$  and  $\Delta bscN$  (Fig. 4A). BspR is a negative regulator  
207 that represses the transcription of genes on the *bsc* locus (14). In *Bordetella* strains that are  
208 unable to secrete type III secreted proteins, such as Bcr4-deficient strains ( $\Delta bcr4$ ), the  
209 repression of the *bsc* locus transcriptions by BspR is enhanced (24). Therefore, we  
210 speculated that the production of BopD and Bsp22 was intensely suppressed by BspR in  
211  $\Delta bscI$  due to the loss of T3SS activity. To test whether this hypothesis is correct, we  
212 generated  $\Delta bspR\Delta bscI$  (a BspR- and Bscl-deficient strain). WCL and CS samples were  
213 prepared from the *B. bronchiseptica* S798 wild-type strain,  $\Delta bspR$ ,  $\Delta bspR\Delta bscI$  or  
214  $\Delta bspR\Delta bscI+bscI$  (Bscl-complemented BspR- and Bscl-deficient strain), and these  
215 samples were separated by SDS-PAGE and analyzed by Western blotting using antibodies  
216 against Bsp22 or BopB (SctE, a translocator and a type III secreted protein). As a result, the  
217 Bsp22 and BopB signals were detected in the WCL samples of the wild-type,  $\Delta bspR$ ,  
218  $\Delta bspR\Delta bscI$  and  $\Delta bspR\Delta bscI+bscI$  strains (Fig. 4B). The Bsp22 and BopB signals were  
219 detected in the CS samples of the wild-type,  $\Delta bspR$  and  $\Delta bspR\Delta bscI+bscI$  strains, but not  
220 in that of the  $\Delta bspR\Delta bscI$  strain (Fig. 4B). These results suggest that in *B. bronchiseptica*,  
221 Bscl is required for the function of the T3SS and is secreted out of the bacterial cell.

222

223 **Bscl plays an important role in the function of the *B. bronchiseptica* T3SS during**

224 **infection of cultured mammalian cells.**

225 To further investigate whether BscI is required for the construction and function of the T3SS  
226 in *B. bronchiseptica*, we infected L2 cells with the wild-type,  $\Delta bscI$ ,  $\Delta bscI+bscI$  or  $\Delta bscN$   
227 and measured the number of Bsp22 (SctA, a translocator, and a component of the  
228 filament-like structure; Fig. 5) signals detected on L2 cells by immunofluorescence  
229 microscopy. For the efficient detection of Bsp22 signals, we cultured the bacteria in  
230 iron-depleted SS medium, which has been shown to increase the amount of type III  
231 secreted protein secreted by *B. bronchiseptica* (28). L2 cells were infected with bacteria for  
232 1 h at an MOI of 2000. Then, Bsp22, F-actin and bacteria were stained with anti-Bsp22  
233 antibody, Rhodamine-Phalloidin and DAPI, respectively (Fig. 5A). The DAPI fluorescence  
234 signals showing bacterial genomic DNA were detected to the same extent among the L2  
235 cells infected with each bacterial strain, suggesting that the amounts of each mutant  
236 adhered to the cells were not significantly reduced when compared to the wild-type strain  
237 (Fig. 5A). The fluorescence signals of Bsp22 were detected on the L2 cells infected with the  
238 wild-type or  $\Delta bscI+bscI$ , but not on the L2 cells infected with  $\Delta bscI$  or  $\Delta bscN$  (Fig. 5 A, B).  
239 We also infected L2 cells with the wild-type,  $\Delta bscI$ ,  $\Delta bscI+bscI$  or  $\Delta bscN$  for 1 h at an MOI of  
240 200 and measured the amount of LDH released into the extracellular medium. The results  
241 showed that LDH was detected in the medium of L2 cells infected with the wild-type or  
242  $\Delta bscI+bscI$ , but not in the medium of L2 cells infected with  $\Delta bscI$  or  $\Delta bscN$  (Fig. 5 C). These

243 results suggest that BscI is required for the construction of the T3SS and induction of  
244 T3SS-dependent death of mammalian cells in *B. bronchiseptica*.

245

246 **Bcr4 is required for the stability of BscI and is suggested to interact with BscI in *B.***  
247 ***bronchiseptica*.**

248 As mentioned above, our results suggested that Bcr4 interacts with BscI (Fig. 1). Because  
249 Bcr4 has various properties like those of chaperones for the type III secreted proteins (25),  
250 e.g., low molecular mass (18.1 kDa) and low isoelectric point (pI 4.41), we investigated  
251 whether Bcr4 is involved in the stability of BscI. We cultured the *B. bronchiseptica* wild-type,  
252 Bcr4-deficient strain ( $\Delta bcr4$ , T3SS-inactive strain) (24), BspR-deficient strain ( $\Delta bspR$ ,  
253 T3SS-overproducing and -oversecreting strain) (14) or BspR- and Bcr4-deficient strain  
254 ( $\Delta bspR$ , a T3SS-overproducing but -inactive strain) (24) in SS medium. The prepared WCL  
255 samples were separated by SDS-PAGE, and Western blotting was performed using  
256 antibodies against BscI, BscJ (SctJ, a protein composing the inner membrane ring of the  
257 T3SS), or Bcr4. As shown in Fig. S1, the negative regulatory function of BspR, which  
258 represses the *bsc* locus transcription, is enhanced in the strain that loses the activity  
259 of T3SS, e.g.,  $\Delta bcr4$  (24). Because of this property of BspR, the BscJ signal of the WCL  
260 sample was weaker in  $\Delta bcr4$  than in the wild-type (Fig. 6A). In  $\Delta bspR$  and  $\Delta bspR\Delta bcr4$ ,  
261 BscJ signals of the WCL samples were more strongly detected when compared to the  
262 wild-type (Fig. 6A) due to the BspR deficiency. On the other hand, the BscI signals of the

263 WCL and CS samples were detected in  $\Delta bspR$ , but not in the  $\Delta bspR\Delta bcr4$  strain (Fig. 6A).  
264 To investigate the presence of *bscl* mRNA in  $\Delta bspR\Delta bcr4$ , a quantitative RT-PCR was  
265 performed. The results showed that the amount of *bscl* mRNA in  $\Delta bspR\Delta bcr4$  was 1.5-fold  
266 higher than that of *bscl* in  $\Delta bspR$  (Fig. S4), demonstrating that the *bscl* gene is transcribed  
267 in  $\Delta bspR\Delta bcr4$ . These results suggest that Bcr4 is necessary for the stability of BscI in *B.*  
268 *bronchiseptica*. Finally, we examined whether Bcr4 binds to BscI inside of the *B.*  
269 *bronchiseptica* cells. As described in the Discussion section, we were unable to detect an  
270 interaction of Bcr4 with BscI by immunoprecipitation because of the low level of BscI protein  
271 in bacterial cells. Therefore, we attempted to reveal the interaction by using a cross linker.  
272 We treated the wild-type,  $\Delta bspR$  and  $\Delta bspR\Delta bcr4$  strains with disuccinimidyl suberate  
273 (DSS) and then prepared the whole cell lysate samples. The samples were separated by  
274 SDS-PAGE and then analyzed by Western blotting using anti-Bcr4 antibody. As a result, an  
275 extra signal around 33 kDa was evident in  $\Delta bspR$  but not in  $\Delta bspR\Delta bscI$  (Fig. 6B). The size  
276 of the extra signal was almost equivalent to that of the Bcr4-BscI complex, suggesting the  
277 possibility that Bcr4 binds to BscI in the *B. bronchiseptica* cells.

278

279

280

281

282

283

284



## 285 Discussion

286 In the present study, we found that deletion of BscI in *B. bronchiseptica* abolished the  
287 extracellular secretion of type III secreted proteins (Fig. 4, 5). In addition, when Bcr4 was  
288 deleted in the *B. bronchiseptica* BspR-deficient strain, BscI (SctI, a protein composing the  
289 inner rod of the *Bordetella* T3SS) was not detected in the bacterial cells (Fig. 6A). These  
290 results suggest that Bcr4 contributes to the establishment of the T3SS in *B. bronchiseptica*  
291 by stabilizing BscI (Fig. 7).

292 To date, chaperones for needles, translocators and effectors have been reported in  
293 bacteria that retain the T3SS, such as *Yersinia* (29-32). However, a chaperone for the inner  
294 rod protein has not been reported, and the mechanism underlying stability of the inner rod  
295 in the bacterial cell and the transport of inner rods to the T3SS remain unclear.

296 In the present study, it was suggested that both the 58–109 and 110–173 amino acid  
297 regions of Bcr4 are required for the binding of Bcr4 to BscI (Fig. 2B). To investigate whether  
298 the 1–57 amino acids region of Bcr4 is also required for the binding of Bcr4 to BscI, we  
299 attempted to purify Bcr4 lacking the N-terminal 1–57 amino acids region (Bcr4 $\Delta$ 1-57-Strep).  
300 However, the amount of Bcr4 $\Delta$ 1-57-Strep produced in *E. coli* was extremely low (data not  
301 shown), so a pull-down assay could not be performed. Figure 3B suggests that the 159–  
302 163 amino acids region of Bcr4 is required for the function of the T3SS. However, it is still  
303 unclear whether the 159–163 amino acids region of Bcr4 is required for binding to BscI.

304 Further analysis is needed to clarify whether the binding of Bcr4 to BscI is required for the  
305 function of T3SS.

306 In this study, the BopD signal was detected in the WCL of the *B. bronchiseptica*  
307 wild-type strain, but the BscI signal was not detected (Fig. 4A). We detected *bscI* mRNA in  
308 *B. bronchiseptica*, and the amount of *bscI* mRNA was not less than that of *bopD* mRNA (Fig.  
309 S5). Therefore, the amount of BscI protein present in *B. bronchiseptica* was considered to  
310 be much lower than that of BopD. The reason for this finding is unknown, but it could be  
311 due to the low efficiency of translation of the *bscI* gene. In order to detect BscI in the whole  
312 cell lysate, we prepared the samples at 0 hr to 18 hr after suspending the bacteria in liquid  
313 broth. However, no signals were detected in the whole cell lysate samples prepared from  
314 the wild-type strain or the  $\Delta bcr4$  strain (Fig. S6). We also used the  $\Delta bspR$  and  $\Delta bspR\Delta bcr4$   
315 strains, and detected BscI signals in the  $\Delta bspR$  strain, but not in the  $\Delta bspR\Delta bcr4$  double  
316 knockout strain (Fig. S6), strongly suggesting that Bcr4 is important for the stability of BscI.

317 In this study, we attempted to detect the BscI signal using a BspR-deficient strain  
318 ( $\Delta bspR$ ), in which the gene transcriptions on the *bsc* locus are promoted (Fig. 6), because  
319 the BscI signal was not detected in the WCL sample of the *B. bronchiseptica* wild-type (Fig.  
320 4). The *bscJ* gene is located downstream of the *bscI* gene (Fig. 1A), and the BscJ protein is  
321 predicted to function as an inner membrane ring (SctJ), a component of the T3SS. The  
322 signal intensity of BscJ was not decreased in the WCL sample of the BspR/Bcr4  
323 double-deficient strain ( $\Delta bspR\Delta bcr4$ ) compared to that of  $\Delta bspR$  (Fig. 6A), suggesting that

324 Bcr4 is not involved in the stability of BscJ. Therefore, it is suggested that Bcr4 specifically  
325 stabilizes Bscl. In order to detect the interaction between Bcr4 and Bscl in the *B.*  
326 *bronchiseptica* cells, immunoprecipitation was performed using anti-Bscl antibody against  
327  $\Delta bspR$  lysate. The immunoprecipitated fractions were analyzed by Western blotting using  
328 anti-Bscl antibody; however, an evident Bscl signal was not detected (data not shown). The  
329 results of our immunoprecipitation assay were thus unable to demonstrate a specific  
330 interaction between Bcr4 and Bscl. We speculate that *B. bronchiseptica* did not maintain  
331 a sufficient amount of Bscl in whole cell lysate to detect the interaction by  
332 immunoprecipitation. In Fig. 6B, we obtained an extra signal around 33 kDa in Western  
333 blotting using anti-Bcr4 antibody when we analyzed the lysate of *B. bronchiseptica* treated  
334 with a cross-linker, DSS. When we performed the Western blotting using anti-Bscl antibody  
335 for the cross-linked lysate, the extra signal was not detected (data not shown).

336 In order to examine whether Bcr4 has structural similarity to any chaperones for the type  
337 III secreted proteins produced by other bacteria, we used AlphaFold2. As a result, we  
338 detected significant structural similarities to the other chaperones, *Aeromonas* AcrH (34)  
339 and *Pseudomonas* PscG (35) (Fig. S7). Although we obtained no plausible structural model  
340 for the interaction between Bscl and Bcr4, the results strongly suggest that Bcr4 is a  
341 chaperone.

342 It is still unclear how Bcr4 antagonizes the BspR-negative regulation activity, and how  
343 overexpression of Bcr4 promotes the production and secretion of type III secreted proteins

344 in *B. bronchiseptica*. Further analysis is needed to elucidate the detailed molecular  
345 mechanism by which Bcr4 contributes to the regulation and establishment of the T3SS.

346

347

348

349

350

351

352

353

354

355

356

357

358

359

## 360 **Materials and Methods**

### 361 **Bacterial strains and cell culture.**

362 The strains used in this study are listed in Table 1. *B. bronchiceptica* S798 (6) was used  
363 as the wild-type strain.  $\Delta bscN$  (a BscN-deficient strain),  $\Delta bcr4$  (a Bcr4-deficient strain),  
364  $\Delta bspR$  (a BspR-deficient strain) and  $\Delta bspR\Delta bcr4$  (a BspR and Bcr4-deficient strain) have  
365 been described elsewhere (6, 14, 24). *Escherichia coli* DH10B, BL21 (36) and Sm10 $\lambda$ pir  
366 were used for DNA cloning, recombinant protein expression and conjugation, respectively  
367 (Table 1). *B. bronchiceptica* was grown on Bordet-Gengou agar plates at 37°C for 2 days.  
368 Fresh colonies of *B. bronchiceptica* were cultured in Stainer-Scholt (SS) medium (37) with a  
369 starting  $A_{600}$  of 0.23 under vigorous shaking conditions at 37°C. L2 cells, a rat lung epithelial  
370 cell line (ATCC CCL-149), were maintained in F-12K (Invitrogen). The cell culture medium  
371 was supplemented with 10% fetal calf serum (FCS). L2 cells were grown at 37°C under a  
372 5% CO<sub>2</sub> atmosphere.

373

### 374 **Preparation of proteins from culture supernatants and whole bacterial cell lysates.**

375 Proteins secreted into bacterial culture supernatants and whole bacterial cell lysates  
376 were prepared as described previously (38). The loaded sample amounts were adjusted by  
377 the  $A_{600}$  of each bacterial culture to load samples prepared from the same amounts of  
378 bacteria. The protein samples were separated by SDS-PAGE and analyzed by Western  
379 blotting.

380

381 **Antibodies.**

382 Anti-BteA, anti-BopD, anti-Bsp22, BspR, BopB, and anti-Bcr4 antibodies were purified  
383 from rabbit serum in our previous study (6, 7, 10, 14, 24, 39). Mouse anti-V5 and anti-RNA  
384 polymerase beta subunit (RpoB) monoclonal antibodies were purchased from Santa Cruz  
385 Biotechnology and BioLegend, respectively. To detect filamentous hemagglutinin (FHA)  
386 signals, we used mouse anti-FHA serum kindly gifted from K. Kamachi (National Institute of  
387 Infectious Diseases). To prepare the anti-Bscl and anti-BscJ antibodies, the peptides  
388 corresponding to the C-terminus regions of Bscl (CKAIGRATQNVDTLARMS) and BscJ  
389 (CRGEGRGGAGAGATEGAGHD) were conjugated with hemocyanin from keyhole limpets  
390 (Sigma), respectively, by using 3-maleimidobenzoic acid N-hydroxysuccinimide ester  
391 (Sigma). These cross-linked peptides were used to immunize rabbits, and the resulting  
392 anti-sera were incubated with the same peptides immobilized on epoxy-activated  
393 sepharose 6B (Amersham) to obtain specific Ig-fractions.

394

395 **Immunofluorescence staining of L2 cells infected with *B. bronchiseptica*.**

396 Immunofluorescent staining assay was performed as previously described (38), with  
397 slight modifications. Briefly, L2 cells were seeded on coverslips in 6-well plates and  
398 incubated overnight. In order to detect adequate amounts of Bsp22 signals, we infected the  
399 L2 cells with *B. bronchiseptica* cultured in iron-depleted SS medium at an MOI of 2000. To

400 avoid excessive killing of L2 cells with bacteria, the plates were not centrifuged. After being  
401 incubated for 1 h at 37°C under a 5% CO<sub>2</sub> atmosphere, the infected L2 cells were  
402 immunostained. Average numbers of Bsp22 signals on single L2 cells were measured by a  
403 fluorescence microscope.

404

#### 405 **LDH Assays.**

406 LDH assays were performed as previously described (38). Briefly, to examine whether  
407 lactate dehydrogenase (LDH) is released from *B. bronchiseptica*-infected cells, 5.0×10<sup>4</sup>  
408 cells/well of L2 cells seeded in 24-well plates were infected with bacteria at an MOI of 50 or  
409 200. The plates were centrifuged at 900×g for 5 min and incubated for 3 h at 37°C under a  
410 5% CO<sub>2</sub> atmosphere. The amounts of LDH were measured spectrophotometrically using a  
411 Cyto-Tox 96 Non-radioactive Cytotoxicity Assay kit (Promega). The LDH (%) level is shown  
412 as a ratio, with the value obtained from the well treated with 0.1% Triton X-100 set as  
413 100%.

414

#### 415 **Cross-linking Assay**

416 The cross-linking assay was performed as previously described (40). A 100 µL culture of  
417 *B. bronchiseptica* was centrifuged at 20,000×g and the supernatant was removed. The  
418 pellet was washed with PBS and resuspended in 100 µL of PBS. Then, disuccinimidyl  
419 suberate (DSS (Thermo)) dissolved in DMSO was added at a final concentration of 10 mM.

420 After incubation on ice for 1 h, Tris-HCl pH8.0 was added at a final concentration of 50 mM.  
421 The solution was centrifuged at 20,000×g, and the supernatant was removed. The pellet  
422 was dissolved in 2×SDS-PAGE sample buffer. The samples were prepared from the same  
423 amounts of bacteria based on the A<sub>600</sub> values of the bacterial culture, then separated by  
424 SDS-PAGE, and analyzed by Western blotting.

425

#### 426 **Statistical analyses**

427 The statistical analyses were performed using the nonparametric test with a two-tailed  
428 p-value with Prism ver. 5.0f software (Graphpad, La Jolla, CA). Values of p<0.05 were  
429 considered significant.

430

#### 431 **Others**

432 The pull-down assay, the construction of *bscI* gene-disrupted or *bspR/bscI* double strains,  
433 the construction of the plasmids used for producing Bcr4 derivatives and BscI  
434 complementation, the quantitative reverse transcription-PCR, and Protein structure  
435 prediction are described in Text S. Plasmids and Primers used in this study are listed in  
436 Table S2 and S3, respectively.

437

438

439



440

441

## 442 **Acknowledgements**

443 This work was supported in part by grants (19K07542 to A.A.; 20K07485 to A.K.;  
444 19K07561 to T.H.) from the Ministry of Education, Culture, Sports, Science and Technology  
445 and the Japan Society for the Promotion of Science (KAKENHI), and a grant  
446 (JP22gm1610003 to M.S. and A.K.) from the Japan Agency for Medical Research and  
447 Development (AMED).

448 The funders had no role in the study design, data collection or analysis, the decision to  
449 publish, or the preparation of manuscript.

450

451

452

453

454

455

456

457

458

459

460

461

## 462 **References**

- 463 1. Goodnow RA. 1980. Biology of *Bordetella bronchiseptica*. Microbiol Rev 44:722-38.
- 464 2. Mattoo S, Cherry JD. 2005. Molecular pathogenesis, epidemiology, and clinical  
465 manifestations of respiratory infections due to *Bordetella pertussis* and other  
466 *Bordetella* subspecies. Clin Microbiol Rev 18:326-82.
- 467 3. Cornelis GR, Van Gijsegem F. 2000. Assembly and function of type III secretory  
468 systems. Annu Rev Microbiol 54:735-74.
- 469 4. Büttner D. 2012. Protein export according to schedule: architecture, assembly, and  
470 regulation of type III secretion systems from plant- and animal-pathogenic bacteria.  
471 Microbiol Mol Biol Rev 76:262-310.
- 472 5. Deng W, Marshall NC, Rowland JL, McCoy JM, Worrall LJ, Santos AS, Strynadka  
473 NCJ, Finlay BB. 2017. Assembly, structure, function and regulation of type III  
474 secretion systems. Nat Rev Microbiol 15:323-337.
- 475 6. Kuwae A, Ohishi M, Watanabe M, Nagai M, Abe A. 2003. BopB is a type III secreted  
476 protein in *Bordetella bronchiseptica* and is required for cytotoxicity against cultured  
477 mammalian cells. Cell Microbiol 5:973-83.
- 478 7. Nogawa H, Kuwae A, Matsuzawa T, Abe A. 2004. The type III secreted protein BopD  
479 in *Bordetella bronchiseptica* is complexed with BopB for pore formation on the host  
480 plasma membrane. J Bacteriol 186:3806-13.
- 481 8. Yuk MH, Harvill ET, Cotter PA, Miller JF. 2000. Modulation of host immune

- 482 responses, induction of apoptosis and inhibition of NF-kappaB activation by the  
483 *Bordetella* type III secretion system. Mol Microbiol 35:991-1004.
- 484 9. Panina EM, Mattoo S, Griffith N, Kozak NA, Yuk MH, Miller JF. 2005. A genome-wide  
485 screen identifies a *Bordetella* type III secretion effector and candidate effectors in  
486 other species. Mol Microbiol 58:267-79.
- 487 10. Kuwae A, Matsuzawa T, Ishikawa N, Abe H, Nonaka T, Fukuda H, Imajoh-Ohmi S,  
488 Abe A. 2006. BopC is a novel type III effector secreted by *Bordetella bronchiseptica*  
489 and has a critical role in type III-dependent necrotic cell death. J Biol Chem  
490 281:6589-600.
- 491 11. Nagamatsu K, Kuwae A, Konaka T, Nagai S, Yoshida S, Eguchi M, Watanabe M,  
492 Mimuro H, Koyasu S, Abe A. 2009. *Bordetella* evades the host immune system by  
493 inducing IL-10 through a type III effector, BopN. J Exp Med 206:3073-88.
- 494 12. Abe A, Nishimura R, Kuwae A. 2017. *Bordetella* effector BopN is translocated into  
495 host cells via its N-terminal residues. Microbiol Immunol 61:206-214.
- 496 13. Ahuja U, Liu M, Tomida S, Park J, Souda P, Whitelegge J, Li H, Harvill ET, Parkhill J,  
497 Miller JF. 2012. Phenotypic and genomic analysis of hypervirulent human-associated  
498 *Bordetella bronchiseptica*. BMC Microbiol 12:167.
- 499 14. Kurushima J, Kuwae A, Abe A. 2012. The type III secreted protein BspR regulates  
500 the virulence genes in *Bordetella bronchiseptica*. PLoS One 7:e38925.
- 501 15. Medhekar B, Shrivastava R, Mattoo S, Gingery M, Miller JF. 2009. *Bordetella* Bsp22

- 502 forms a filamentous type III secretion system tip complex and is immunoprotective in  
503 vitro and in vivo. *Mol Microbiol* 71:492-504.
- 504 16. Ahuja U, Shokeen B, Cheng N, Cho Y, Blum C, Coppola G, Miller JF. 2016.  
505 Differential regulation of type III secretion and virulence genes in *Bordetella*  
506 *pertussis* and *Bordetella bronchiseptica* by a secreted anti-sigma factor. *Proc Natl*  
507 *Acad Sci U S A* 113:2341-8.
- 508 17. Feldman MF, Cornelis GR. 2003. The multitalented type III chaperones: all you can  
509 do with 15 kDa. *FEMS Microbiol Lett* 219:151-8.
- 510 18. Stebbins CE, Galán JE. 2001. Maintenance of an unfolded polypeptide by a cognate  
511 chaperone in bacterial type III secretion. *Nature* 414:77-81.
- 512 19. Lloyd SA, Norman M, Rosqvist R, Wolf-Watz H. 2001. *Yersinia* YopE is targeted for  
513 type III secretion by N-terminal, not mRNA, signals. *Mol Microbiol* 39:520-31.
- 514 20. Lee SH, Galán JE. 2004. *Salmonella* type III secretion-associated chaperones  
515 confer secretion-pathway specificity. *Mol Microbiol* 51:483-95.
- 516 21. Quinaud M, Chabert J, Faudry E, Neumann E, Lemaire D, Pastor A, Elsen S,  
517 Dessen A, Attree I. 2005. The PscE-PscF-PscG complex controls type III secretion  
518 needle biogenesis in *Pseudomonas aeruginosa*. *J Biol Chem* 280:36293-300.
- 519 22. Wood SE, Jin J, Lloyd SA. 2008. YscP and YscU switch the substrate specificity of  
520 the *Yersinia* type III secretion system by regulating export of the inner rod protein  
521 YscI. *J Bacteriol* 190:4252-62.

- 522 23. Monlezun L, Liebl D, Fenel D, Grandjean T, Berry A, Schoehn G, Dessein R, Faudry  
523 E, Attree I. 2015. PscI is a type III secretion needle anchoring protein with in vitro  
524 polymerization capacities. *Mol Microbiol* 96:419-36.
- 525 24. Nishimura R, Abe A, Sakuma Y, Kuwae A. 2018. *Bordetella bronchiseptica* Bcr4  
526 antagonizes the negative regulatory function of BspR via its role in type III secretion.  
527 *Microbiol Immunol* 62:743-754.
- 528 25. Wattiau P, Bernier B, Deslée P, Michiels T, Cornelis GR. 1994. Individual chaperones  
529 required for Yop secretion by *Yersinia*. *Proc Natl Acad Sci U S A* 91:10493-7.
- 530 26. Kamanova J. 2020. *Bordetella* Type III Secretion Injectosome and Effector Proteins.  
531 *Front Cell Infect Microbiol* 10:466.
- 532 27. Yuk MH, Harvill ET, Miller JF. 1998. The BvgAS virulence control system regulates  
533 type III secretion in *Bordetella bronchiseptica*. *Mol Microbiol* 28:945-59.
- 534 28. Kurushima J, Kuwae A, Abe A. 2012. Iron starvation regulates the type III secretion  
535 system in *Bordetella bronchiseptica*. *Microbiol Immunol* 56:356-62.
- 536 29. Sun P, Tropea JE, Austin BP, Cherry S, Waugh DS. 2008. Structural characterization  
537 of the *Yersinia pestis* type III secretion system needle protein YscF in complex with  
538 its heterodimeric chaperone YscE/YscG. *J Mol Biol* 377:819-30.
- 539 30. Day JB, Guller I, Plano GV. 2000. *Yersinia pestis* YscG protein is a Syc-like  
540 chaperone that directly binds yscE. *Infect Immun* 68:6466-71.
- 541 31. Francis MS, Aili M, Wiklund ML, Wolf-Watz H. 2000. A study of the YopD-IcrH

- 542 interaction from *Yersinia pseudotuberculosis* reveals a role for hydrophobic residues  
543 within the amphipathic domain of YopD. Mol Microbiol 38:85-102.
- 544 32. Woestyn S, Sory MP, Boland A, Lequenne O, Cornelis GR. 1996. The cytosolic SycE  
545 and SycH chaperones of *Yersinia* protect the region of YopE and YopH involved in  
546 translocation across eukaryotic cell membranes. Mol Microbiol 20:1261-71.
- 547 33. Yang H, Shan Z, Kim J, Wu W, Lian W, Zeng L, Xing L, Jin S. 2007. Regulatory role  
548 of PopN and its interacting partners in type III secretion of *Pseudomonas aeruginosa*.  
549 J Bacteriol 189:2599-609.
- 550 34. Nguyen VS, Jobichen C, Tan KW, Tan YW, Chan SL, Ramesh K, Yuan Y, Hong Y,  
551 Seetharaman J, Leung KY, Sivaraman J, Mok YK. 2015. Structure of AcrH-AopB  
552 Chaperone-Translocator Complex Reveals a Role for Membrane Hairpins in Type III  
553 Secretion System Translocon Assembly. Structure 23:2022-31.
- 554 35. Quinaud M, Ple S, Job V, Contreras-Martel C, Simorre JP, Attree I, Dessen A. 2007.  
555 Structure of the heterotrimeric complex that regulates type III secretion needle  
556 formation. Proc Natl Acad Sci U S A 104:7803-8.
- 557 36. Studier FW, Moffatt BA. 1986. Use of bacteriophage T7 RNA polymerase to direct  
558 selective high-level expression of cloned genes. J Mol Biol 189:113-30.
- 559 37. Stainer DW, Scholte MJ. 1970. A simple chemically defined medium for the  
560 production of phase I *Bordetella pertussis*. J Gen Microbiol 63:211-20.
- 561 38. Goto M, Hanawa T, Abe A, Kuwae A. 2020. Transcriptional Downregulation of a Type

562 III Secretion System under Reducing Conditions in *Bordetella pertussis*. J Bacteriol  
563 202.

564 39. Kurushima J, Kuwae A, Abe A. 2012. Btc22 chaperone is required for secretion and  
565 stability of the type III secreted protein Bsp22 in *Bordetella bronchiseptica*. FEMS  
566 Microbiol Lett 331:144-51.

567 40. Rappl C, Deiwick J, Hensel M. 2003. Acidic pH is required for the functional  
568 assembly of the type III secretion system encoded by *Salmonella* pathogenicity  
569 island 2. FEMS Microbiol Lett 226:363-72.

570

571

572

573

574

575

576

577

578

579

580

581



582 **Figure legends**

583 **Fig. 1. The interaction of Bcr4 with inner rod protein Bscl.** (A) The *bcr4* gene and its  
584 peripheral genes localized in the T3SS apparatus locus (*bsc* locus) on the *B.*  
585 *bronchiseptica* S798 chromosome are depicted. (B) The purified Bcr4 (Bcr4-Strep) was  
586 loaded on Strep-Tactin beads. Then, the Bcr4-Strep-loaded beads (Bcr4) and the beads  
587 alone (beads) were mixed with the lysates prepared from *E. coli* BL21 producing Bscl,  
588 BscK or BscJ tagged with V5 (Bscl-V5, BscK-V5 or BscJ-V5), respectively. After 3 h  
589 incubation at 4°C, each supernatant was prepared as the supernatant fraction (Sup) sample,  
590 and each pellet was washed with TBS or TBS containing 0.1% Triton X-100 (Triton) and  
591 prepared as the pellet fraction (Pellet) sample. The Sup and Pellet samples were separated  
592 by SDS-PAGE and analyzed by Western blotting (WB) with anti-V5 antibody (top). Pellet  
593 samples were also stained with Coomassie Brilliant Blue (CBB, bottom). (C) The purified  
594 Bscl (Bscl-Strep) or N-terminal moiety of BteA (amino acids region 1–312, BteA-N-Strep)  
595 were loaded on Strep-Tactin beads. Then, the beads were mixed with the lysate prepared  
596 from *E. coli* BL21 to produce Bcr4 tagged with V5 (Bcr4-V5) at 4°C for 3 h. The prepared  
597 Sup and Pellet samples were separated by SDS-PAGE and analyzed by WB with anti-V5  
598 antibody (top). Pellet samples were also stained with CBB (bottom). Experiments were  
599 performed at least three times, and representative data are shown.

600

601 **Fig. 2. Pull-down assays between Bscl and truncated versions of Bcr4.** (A) Bcr4

602 derivatives used for pull-down assay are depicted. (B) The purified Bcr4-FL, Bcr4 $\Delta$ 58-109  
603 or Bcr4 $\Delta$ 110-173 (Bcr4-FL-Strep, Bcr4 $\Delta$ 58-109-Strep or Bcr4 $\Delta$ 110-17-Strep) was loaded on  
604 Strep-Tactin beads, and then the beads were mixed with the lysate prepared from *E. coli*  
605 BL21, producing Bsci-V5, respectively. After 3 h incubation at 4°C, the supernatant fraction  
606 (Sup) and pellet fraction (Pellet) samples were prepared. The Sup and Pellet samples were  
607 separated by SDS-PAGE and analyzed by Western blotting (WB) with anti-V5 antibody  
608 (top), and stained with Coomassie Brilliant Blue (CBB, bottom). Experiments were  
609 performed at least three times, and representative data are shown.

610

611 **Fig. 3. The Bcr4 domain required for T3SS activity** (A) Bcr4 derivatives used for the  
612 analysis of T3SS activity are depicted. (B) The *B. bronchiseptica* wild-type strain,  
613 Bcr4-deficient strain ( $\Delta bcr4$ ), and  $\Delta bcr4$  producing Bcr4-FL-FLAG ( $\Delta bcr4+bcr4$ -FL-FLAG),  
614 Bcr4 $\Delta$ 169-173-FLAG ( $\Delta bcr4+bcr4\Delta$ 169-173-FLAG), Bcr4 $\Delta$ 164-173-FLAG ( $\Delta bcr4+bcr4$   
615  $\Delta$ 164-173-FLAG), and Bcr4 $\Delta$ 159-173-FLAG ( $\Delta bcr4+bcr4\Delta$ 159-173-FLAG) were cultured in  
616 SS medium. Whole cell lysates (WCL) and culture supernatant fraction (CS) samples were  
617 separated by SDS-PAGE and analyzed by Western blotting using antibodies against Bcr4,  
618 FLAG, BteA, BopD or RpoB. RpoB was used as an internal loading control. AP indicates  
619 the amino acids region of the antigen peptide used for anti-Bcr4 antibody generation. WCL  
620 and CS samples were prepared from equal volumes of bacterial culture. When we  
621 performed Western blotting using anti-BteA or BopD antibodies, we loaded a 100- or

622 50-fold smaller amount of  $\Delta bcr4+bcr4$ -FL-FLAG,  $\Delta bcr4+bcr4\Delta 169-173$ -FLAG and  
623  $\Delta bcr4+bcr4\Delta 164-173$ -FLAG CS samples on the SDS-PAGE gel than on the wild-type,  
624  $\Delta bcr4$  and  $\Delta bcr4+bcr4\Delta 159-173$ -FLAG CS samples to avoid obtaining excess signal  
625 intensities. The numbers at the bottom of the lower panel indicate the relative signal  
626 intensity of RpoB measured using ImageJ software. (C) L2 cells were infected with each  
627 strain at an moi of 50 for 1 h. The amounts of LDH released into the extracellular medium  
628 from infected cells are shown, and the relative cytotoxicity (percent) was determined as  
629 described in the Materials and Methods. Error bars indicate the SEMs from triplicate  
630 experiments. \* $P < 0.05$ . Experiments were performed at least three times, and  
631 representative data are shown.

632

633 **Fig. 4. The effect of BscI deletion on T3SS activity in *B. bronchiseptica*.** (A) Whole cell  
634 lysates (WCL) and culture supernatant fraction (CS) samples were prepared from the  
635 wild-type strain,  $\Delta bscI$  (BscI-deficient strain),  $\Delta bscI+bscI$  (BscI-complemented strain) and  
636  $\Delta bscN$  (T3SS-inactive strain) cultured in SS medium. WCL and CS samples were  
637 separated by SDS-PAGE and analyzed by Western blotting using antibodies against BscI,  
638 BteA, BopD, Bsp22, FHA or RpoB. BscI tagged with Strep (BscI-Strep) was loaded as a  
639 control. \*BscI-Strep signal; \*\*NS (nonspecific signals); \*\*\*A faint signal of BscI. The  
640 numbers at the bottom of the lower panel indicate the relative signal intensity of RpoB  
641 measured using ImageJ software. (B) WCL and CS were prepared from the wild-type,

642  $\Delta bspR$  (BspR-deficient strain),  $\Delta bspR\Delta bscI$  (BspR- and BscI-deficient strain) and  
643  $\Delta bspR\Delta bscI+bscI$  (BscI-complemented BspR- and Bcr4-deficient strain) cultured in SS  
644 medium. WCL and CS were separated by SDS-PAGE and analyzed by Western blotting  
645 using antibodies against BscI, BspR, Bsp22 or BopB antibodies. Loaded WCL and CS  
646 samples were prepared from equal volumes of bacterial culture. When we performed  
647 Western blotting using antibodies against Bsp22 or BopB, we loaded a 25- or 5-fold smaller  
648 amount of  $\Delta bspR$ ,  $\Delta bspR\Delta bscI$  and  $\Delta bspR\Delta bscI+bscI$  WCL samples, and 5- or 10-fold  
649 smaller amount of  $\Delta bspR$  and  $\Delta bspR\Delta bscI+bscI$  CS samples on the SDS-PAGE gel than  
650 the wild-type to avoid obtaining excess signal intensities. Experiments were performed at  
651 least three times, and representative data are shown.

652

653 **Fig. 5. Immunofluorescent staining of Bsp22 on L2 cells infected with *B.***

654 ***bronchiseptica* and the results of the LDH assay.** (A) L2 cells were infected with the

655 wild-type strain,  $\Delta bscI$  (BscI-deficient strain),  $\Delta bscI+bscI$  (BscI-complemented strain) or

656  $\Delta bscN$  (T3SS-inactive strain) as described in the Materials and Methods. After fixation, cells

657 were stained with anti-Bsp22 antibody (green), rhodamine phalloidin (red) and DAPI (blue).

658 The inset shows higher magnification of the boxed area in the image. Arrowheads and

659 arrows indicate the signals of Bsp22 (green) and bacteria, respectively. (B) Bsp22 signals

660 per one cell were counted under a fluorescent microscope. At least 120 cells were

661 randomly chosen. (C) The results of LDH assay at an MOI of 200 are shown as a histogram.

662 Error bars indicate the SEMs from triplicate experiments. \* $P < 0.05$ . Experiments were  
663 performed at least three times, and representative data are shown.

664

665 **Fig. 6. The effect of Bcr4 on BscI stability and the suggestive interaction of Bcr4 with**  
666 **BscI in *B. bronchiseptica*.** (A) The whole cell lysates (WCL) and culture supernatant  
667 fraction (CS) were prepared from the wild-type strain,  $\Delta bcr4$  (Bcr4-deficient strain),  $\Delta bspR$   
668 (BspR-deficient strain) or  $\Delta bspR\Delta bcr4$  (BspR- and Bcr4-deficient strain) cultured in SS  
669 medium. WCL and CS were separated by SDS-PAGE and analyzed by Western blotting  
670 with antibodies against BscI (inner-rod protein), BscJ (inner-ring protein) and Bcr4. The  
671 samples were prepared from equal volumes of bacterial culture. When we carried out  
672 Western blotting using anti-BscJ or Bcr4 antibodies, we loaded a 10-fold-smaller amount of  
673  $\Delta bspR$  or  $\Delta bspR\Delta bcr4$  WCL samples on the SDS-PAGE than WT or  $\Delta bcr4$  WCL samples to  
674 avoid obtaining excess signal intensities. (B) WCL were prepared from the wild-type,  $\Delta bspR$   
675 or  $\Delta bspR\Delta bcr4$  treated with (+) or without (-) cross linker disuccinimidyl suberate (DSS).  
676 WCL were separated by SDS-PAGE and analyzed by Western blotting with anti-Bcr4  
677 antibody. The lower panel is a short exposure of the upper panel. Experiments were  
678 performed at least three times, and representative data are shown.

679

680 **Fig. 7. Schematic depiction of the Bcr4 and BscI functions.** In the *B. bronchiseptica*  
681 bacterial cytosol, Bcr4 (blue) stabilizes BscI (orange). Then, BscI is presumed to be

682 localized to the T3SS machinery (gray) and form the inner rod. BscI is essential for T3SS  
683 activity and secreted from the bacterial cell. BscJ (pink) is predicted to function as an inner  
684 membrane ring. Bsp22 (green) forms a filament-like structure. OM and IM indicate the outer  
685 membrane (white) and inner membrane (white), respectively.

686

687

688

689

690

691

692

693

694

695

696

697

698

699

700

701

Table 1. Bacterial strains used in the study

| Name                     | Relevant genotype                                                 | Reference or source |
|--------------------------|-------------------------------------------------------------------|---------------------|
| <i>B. bronchiseptica</i> |                                                                   |                     |
| S798                     | wild-type strain                                                  | 6                   |
| $\Delta bscI$            | BscI-deficient strain                                             | This study          |
| $\Delta bscN$            | BscN-deficient strain                                             | 6                   |
| $\Delta bcr4$            | Bcr4-deficient strain                                             | 24                  |
| $\Delta bspR$            | BspR-deficient strain                                             | 14                  |
| $\Delta bspR\Delta bscI$ | BspR and BscI-deficient strain                                    | This study          |
| $\Delta bspR\Delta bcr4$ | BspR- and Bcr4-deficient strain                                   | 24                  |
| <i>E. coli</i>           |                                                                   |                     |
| DH10B                    | Host strain for pDONR201, p99- <i>ccdB</i> -V5 and pRK415-R4-R3-F | Invitrogen          |
| BL21                     | Host strain for pColdIII                                          | 36                  |
| Sm10 $\lambda$ pir       | Host strain for pABB-CRS2                                         | 6                   |

A

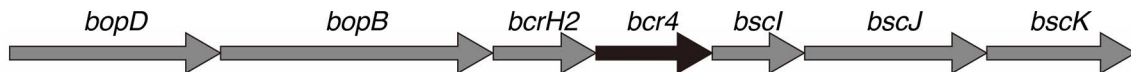

bioRxiv preprint doi: <https://doi.org/10.1101/2021.09.28.462275>; this version posted August 9, 2022. The copyright holder for this preprint (which was not certified by peer review) is the author/funder, who has granted bioRxiv a license to display the preprint in perpetuity. It is made available under aCC-BY 4.0 International license.

B

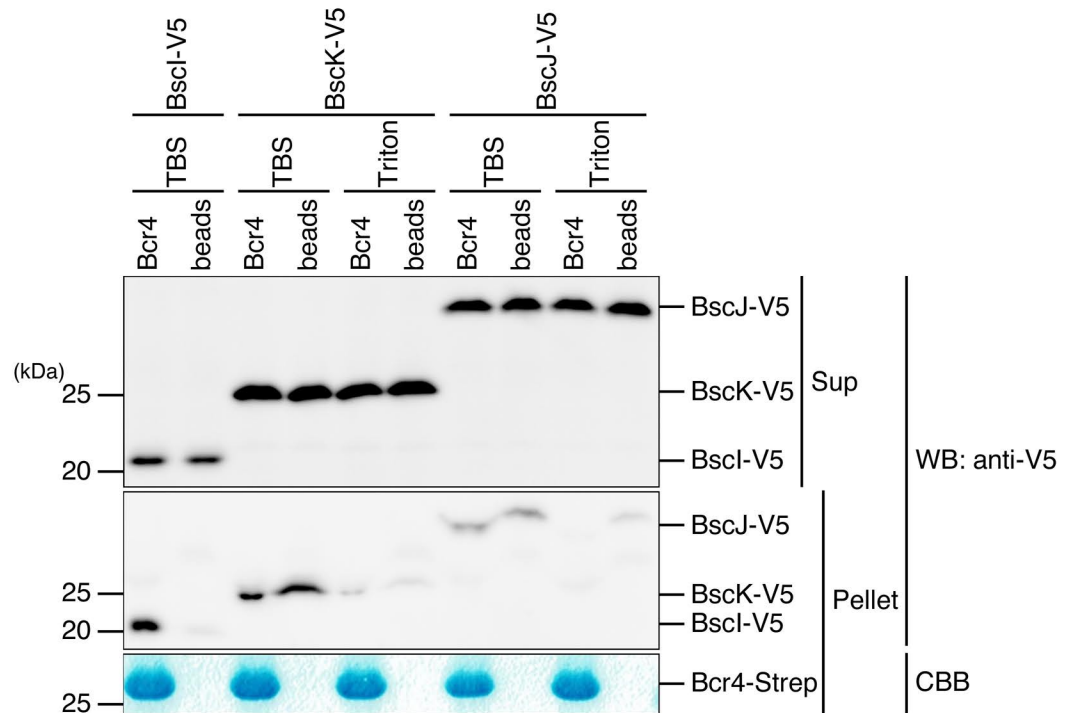

C

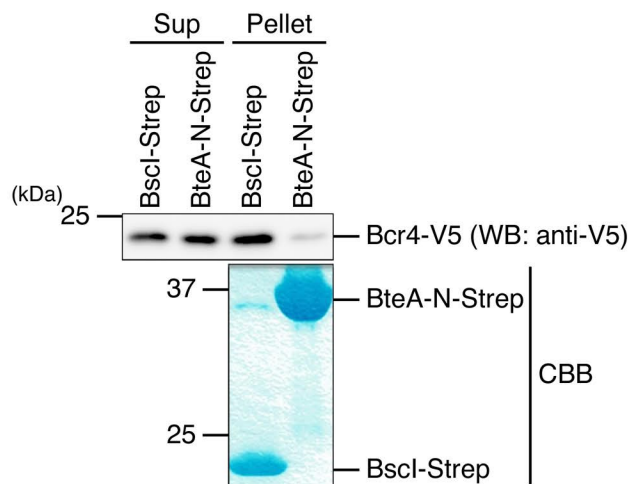

**Fig. 1. The interaction of Bcr4 with inner rod protein BscI.** (A) The *bcr4* gene and its peripheral genes localized in the T3SS apparatus locus (*bsc* locus) on the *B. bronchiseptica* S798 chromosome are depicted. (B) The purified Bcr4 (Bcr4-Strep) was loaded on Strep-Tactin beads. Then, the Bcr4-Strep-loaded beads (Bcr4) and the beads alone (beads) were mixed with the lysates prepared from *E. coli* BL21 producing BscI, BscK or BscJ tagged with V5 (BscI-V5, BscK-V5 or BscJ-V5), respectively. After 3 h incubation at 4°C, each supernatant was prepared as the supernatant fraction (Sup) sample, and each pellet was washed with TBS or TBS containing 0.1% Triton X-100 (Triton) and prepared as the pellet fraction (Pellet) sample. The Sup and Pellet samples were separated by SDS-PAGE and analyzed by Western blotting (WB) with anti-V5 antibody (top). Pellet samples were also stained with Coomassie Brilliant Blue (CBB, bottom). (C) The purified BscI (BscI-Strep) or N-terminal moiety of BteA (amino acids region 1–312, BteA-N-Strep) were loaded on Strep-Tactin beads. Then, the beads were mixed with the lysate prepared from *E. coli* BL21 to produce Bcr4 tagged with V5 (Bcr4-V5) at 4°C for 3 h. The prepared Sup and Pellet samples were separated by SDS-PAGE and analyzed by WB with anti-V5 antibody (top). Pellet samples were also stained with CBB (bottom). Experiments were performed at least three times, and representative data are shown.

Fig. 1



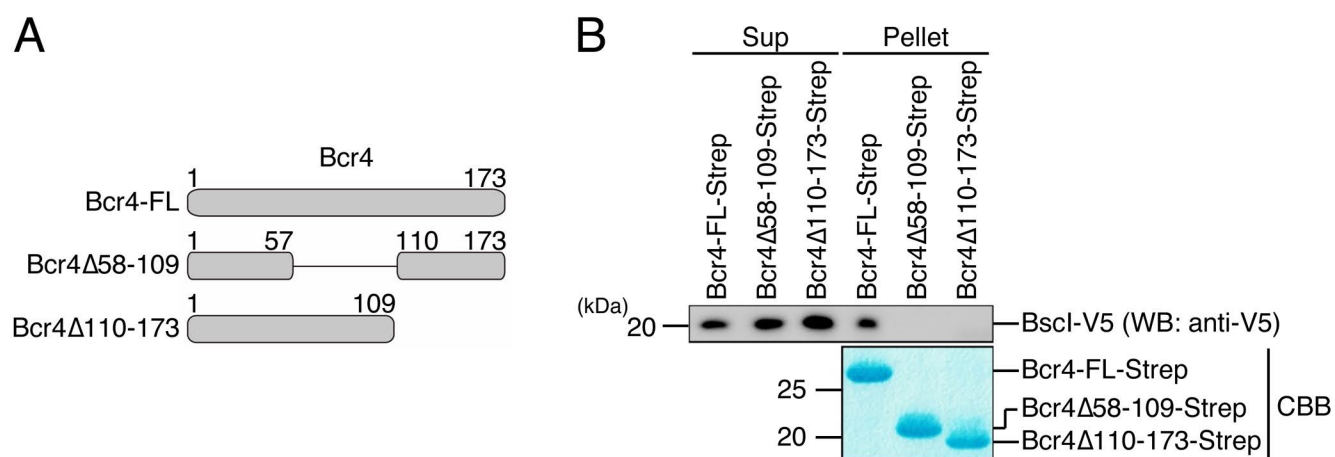

**Fig. 2. Pull-down assays between BscI and truncated versions of Bcr4.** (A) Bcr4 derivatives used for pull-down assay are depicted. (B) The purified Bcr4-FL, Bcr4Δ58-109 or Bcr4Δ110-173 (Bcr4-FL-Strep, Bcr4Δ58-109-Strep or Bcr4Δ110-17-Strep) was loaded on Strep-Tactin beads, and then the beads were mixed with the lysate prepared from *E. coli* BL21, producing BscI-V5, respectively. After 3 h incubation at 4°C, the supernatant fraction (Sup) and pellet fraction (Pellet) samples were prepared. The Sup and Pellet samples were separated by SDS-PAGE and analyzed by Western blotting (WB) with anti-V5 antibody (top), and stained with Coomassie Brilliant Blue (CBB, bottom). Experiments were performed at least three times, and representative data are shown.

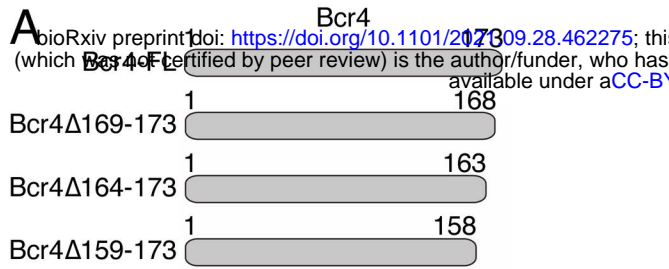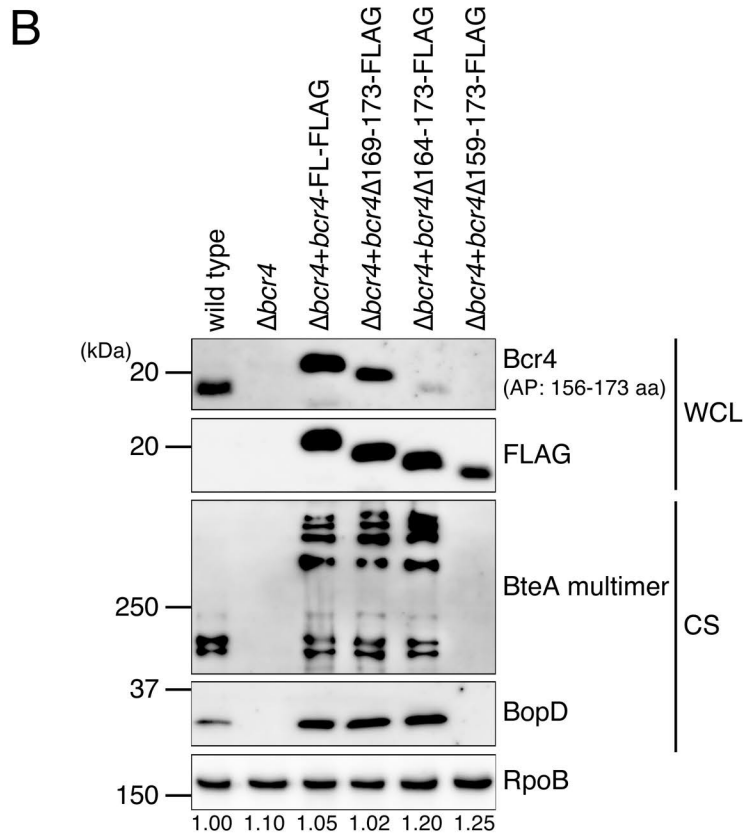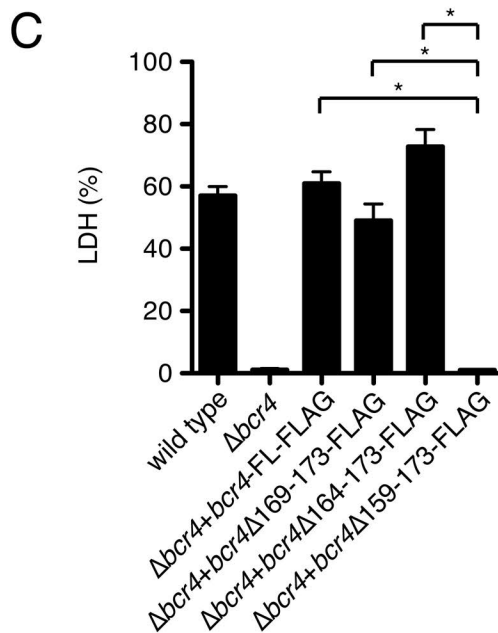

**Fig. 3. The Bcr4 domain required for T3SS activity** (A) Bcr4 derivatives used for the analysis of T3SS activity are depicted. (B) The *B. bronchiseptica* wild-type strain, Bcr4-deficient strain ( $\Delta bcr4$ ), and  $\Delta bcr4$  producing Bcr4-FL-FLAG ( $\Delta bcr4+bcr4$ -FL-FLAG), Bcr4Δ169-173-FLAG ( $\Delta bcr4+bcr4\Delta 169-173$ -FLAG), Bcr4Δ164-173-FLAG ( $\Delta bcr4+bcr4\Delta 164-173$ -FLAG), and Bcr4Δ159-173-FLAG ( $\Delta bcr4+bcr4\Delta 159-173$ -FLAG) were cultured in SS medium. Whole cell lysates (WCL) and culture supernatant fraction (CS) samples were separated by SDS-PAGE and analyzed by Western blotting using antibodies against Bcr4, FLAG, BteA, BopD or RpoB. RpoB was used as an internal loading control. AP indicates the amino acids region of the antigen peptide used for anti-Bcr4 antibody generation. WCL and CS samples were prepared from equal volumes of bacterial culture. When we performed Western blotting using anti-BteA or BopD antibodies, we loaded a 100- or 50-fold smaller amount of  $\Delta bcr4+bcr4$ -FL-FLAG,  $\Delta bcr4+bcr4\Delta 169-173$ -FLAG and  $\Delta bcr4+bcr4\Delta 164-173$ -FLAG CS samples on the SDS-PAGE gel than on the wild-type,  $\Delta bcr4$  and  $\Delta bcr4+bcr4\Delta 159-173$ -FLAG CS samples to avoid obtaining excess signal intensities. The numbers at the bottom of the lower panel indicate the relative signal intensity of RpoB measured using ImageJ software. (C) L2 cells were infected with each strain at an moi of 50 for 1 h. The amounts of LDH released into the extracellular medium from infected cells are shown, and the relative cytotoxicity (percent) was determined as described in the Materials and Methods. Error bars indicate the SEMs from triplicate experiments. \* $P < 0.05$ . Experiments were performed at least three times, and representative data are shown.

A

bioRxiv preprint doi: <https://doi.org/10.1101/2021.09.08.462275>; this version posted August 9, 2022. The copyright holder for this preprint (which was not certified by peer review) is the author/funder, who has granted bioRxiv a license to display the preprint in perpetuity. It is made available under a [CC-BY 4.0 International license](https://creativecommons.org/licenses/by/4.0/).

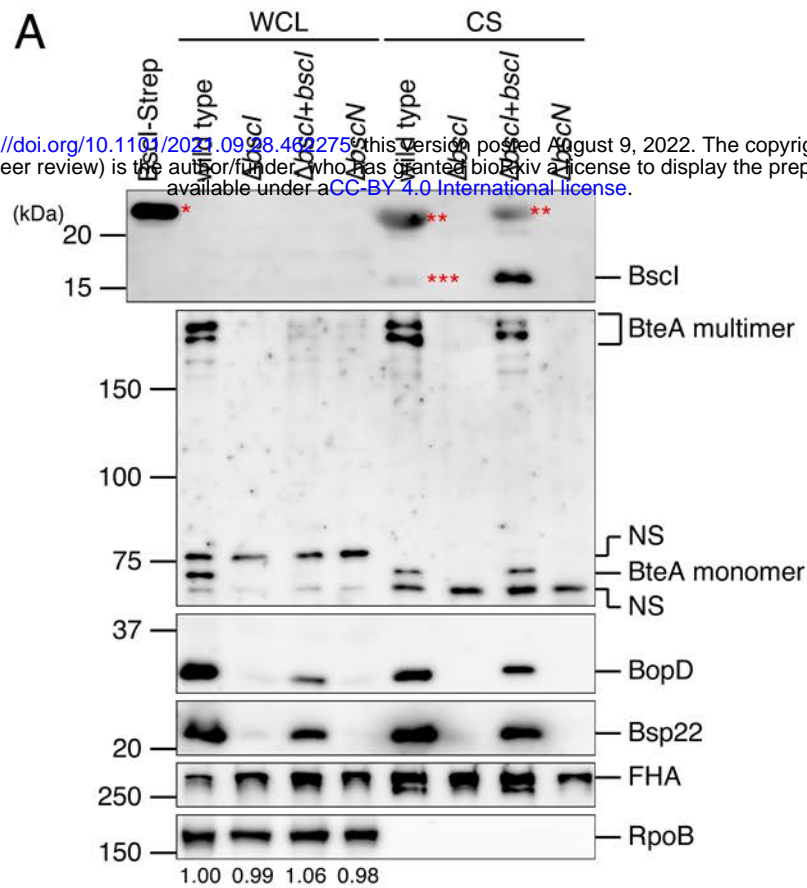

B

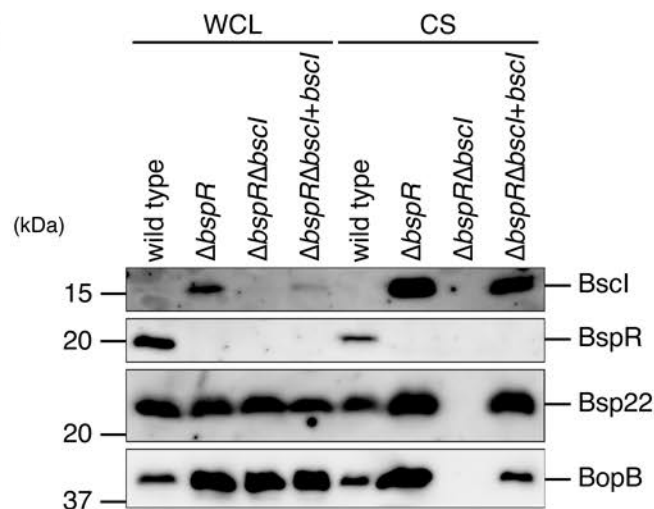

**Fig. 4. The effect of BscI deletion on T3SS activity in *B. bronchiseptica*.** (A) Whole cell lysates (WCL) and culture supernatant fraction (CS) samples were prepared from the wild-type strain,  $\Delta bscI$  (BscI-deficient strain),  $\Delta bscI+bscI$  (BscI-complemented strain) and  $\Delta bscN$  (T3SS-inactive strain) cultured in SS medium. WCL and CS samples were separated by SDS-PAGE and analyzed by Western blotting using antibodies against BscI, BteA, BopD, Bsp22, FHA or RpoB. BscI tagged with Strep (BscI-Strep) was loaded as a control. \*BscI-Strep signal; \*\*NS (nonspecific signals); \*\*\*A faint signal of BscI. The numbers at the bottom of the lower panel indicate the relative signal intensity of RpoB measured using ImageJ software. (B) WCL and CS were prepared from the wild-type,  $\Delta bspR$  (BspR-deficient strain),  $\Delta bspR\Delta bscI$  (BspR- and BscI-deficient strain) and  $\Delta bspR\Delta bscI+bscI$  (BscI-complemented BspR- and Bcr4-deficient strain) cultured in SS medium. WCL and CS were separated by SDS-PAGE and analyzed by Western blotting using antibodies against BscI, BspR, Bsp22 or BopB antibodies. Loaded WCL and CS samples were prepared from equal volumes of bacterial culture. When we performed Western blotting using antibodies against Bsp22 or BopB, we loaded a 25- or 5-fold smaller amount of  $\Delta bspR$ ,  $\Delta bspR\Delta bscI$  and  $\Delta bspR\Delta bscI+bscI$  WCL samples, and 5- or 10-fold smaller amount of  $\Delta bspR$  and  $\Delta bspR\Delta bscI+bscI$  CS samples on the SDS-PAGE gel than the wild-type to avoid obtaining excess signal intensities. Experiments were performed at least three times, and representative data are shown.

Fig. 4

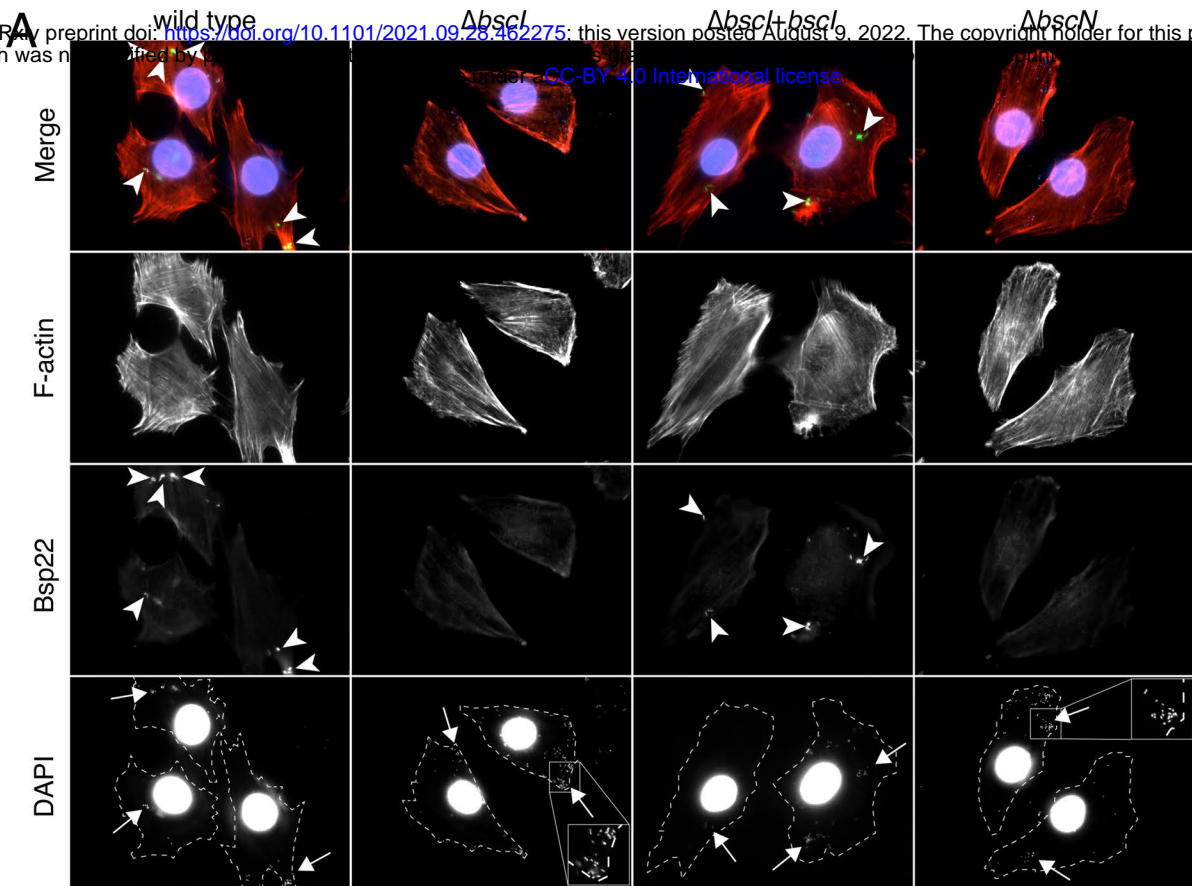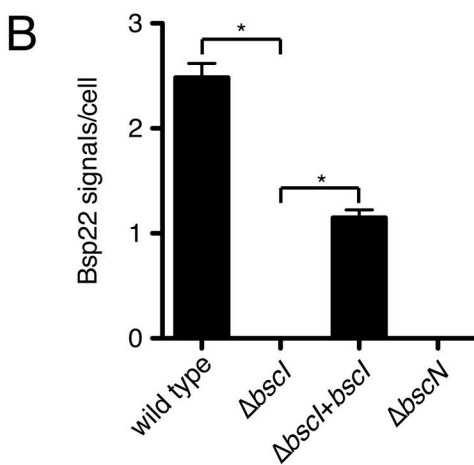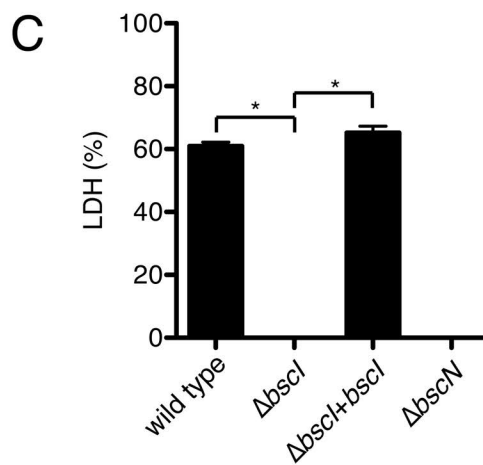

**Fig. 5. Immunofluorescent staining of Bsp22 on L2 cells infected with *B. bronchiseptica* and the results of the LDH assay.** (A) L2 cells were infected with the wild-type strain,  $\Delta bscI$  (BscI-deficient strain),  $\Delta bscI+bscI$  (BscI-complemented strain) or  $\Delta bscN$  (T3SS-inactive strain) as described in the Materials and Methods. After fixation, cells were stained with anti-Bsp22 antibody (green), rhodamine phalloidin (red) and DAPI (blue). The inset shows higher magnification of the boxed area in the image. Arrowheads and arrows indicate the signals of Bsp22 (green) and bacteria, respectively. (B) Bsp22 signals per one cell were counted under a fluorescent microscope. At least 120 cells were randomly chosen. (C) The results of LDH assay at an MOI of 200 are shown as a histogram. Error bars indicate the SEMs from triplicate experiments. \* $P < 0.05$ . Experiments were performed at least three times, and representative data are shown.

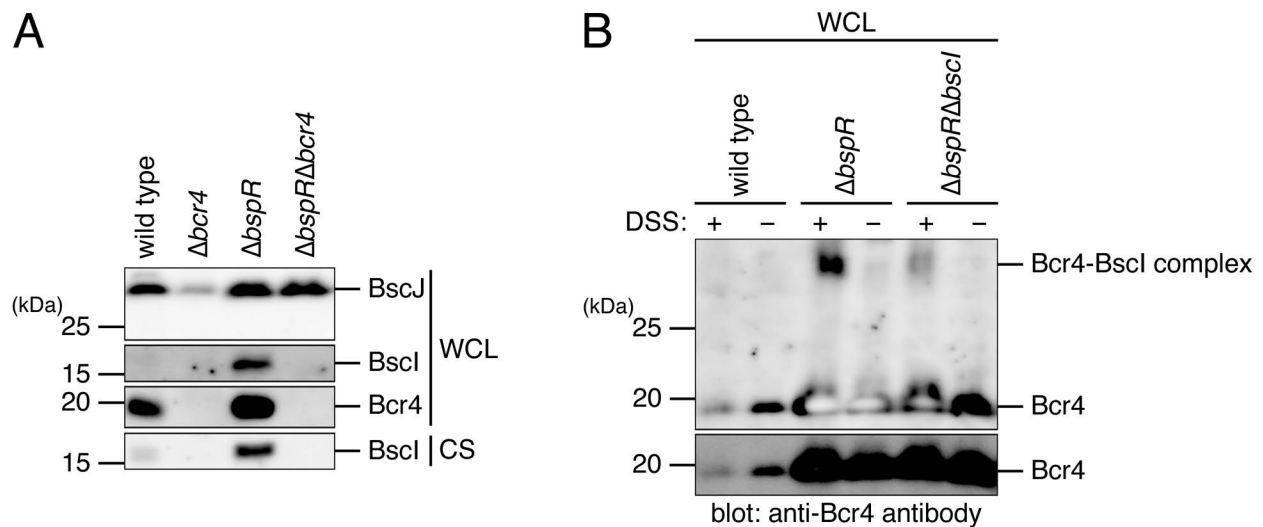

**Fig. 6. The effect of Bcr4 on BscI stability and the suggestive interaction of Bcr4 with BscI in *B. bronchiseptica*.** (A) The whole cell lysates (WCL) and culture supernatant fraction (CS) were prepared from the wild-type strain,  $\Delta bcr4$  (Bcr4-deficient strain),  $\Delta bspR$  (BspR-deficient strain) or  $\Delta bspR\Delta bcr4$  (BspR- and Bcr4-deficient strain) cultured in SS medium. WCL and CS were separated by SDS-PAGE and analyzed by Western blotting with antibodies against BscI (inner-rod protein), BscJ (inner-ring protein) and Bcr4. The samples were prepared from equal volumes of bacterial culture. When we carried out Western blotting using anti-BscJ or Bcr4 antibodies, we loaded a 10-fold-smaller amount of  $\Delta bspR$  or  $\Delta bspR\Delta bcr4$  WCL samples on the SDS-PAGE than WT or  $\Delta bcr4$  WCL samples to avoid obtaining excess signal intensities. (B) WCL were prepared from the wild-type,  $\Delta bspR$  or  $\Delta bspR\Delta bcr4$  treated with (+) or without (-) cross linker disuccinimidyl suberate (DSS). WCL were separated by SDS-PAGE and analyzed by Western blotting with anti-Bcr4 antibody. The lower panel is a short exposure of the upper panel. Experiments were performed at least three times, and representative data are shown.

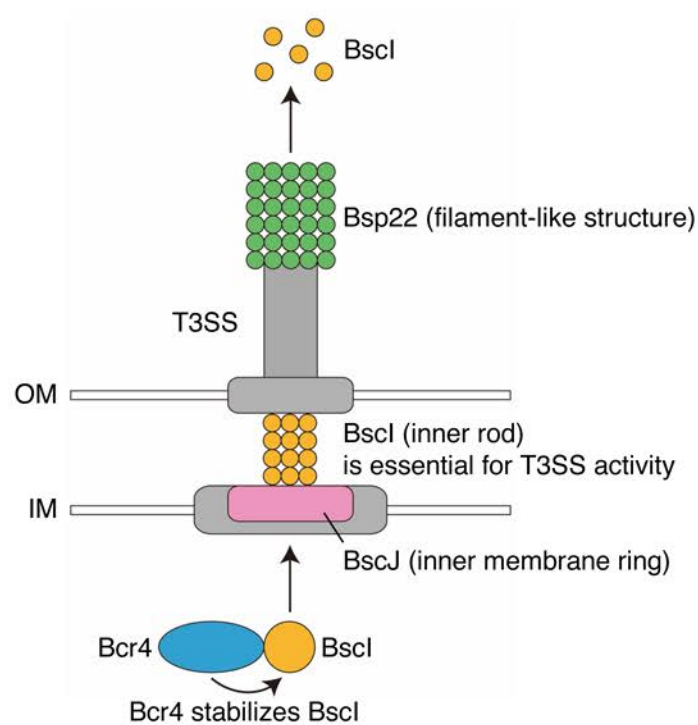

**Fig. 7. Schematic depiction of the Bcr4 and BscI functions.** In the *B. bronchiseptica* bacterial cytosol, Bcr4 (blue) stabilizes BscI (orange). Then, BscI is presumed to be localized to the T3SS machinery (gray) and form the inner rod. BscI is essential for T3SS activity and secreted from the bacterial cell. BscJ (pink) is predicted to function as an inner membrane ring. Bsp22 (green) forms a filament-like structure. OM and IM indicate the outer membrane (white) and inner membrane (white), respectively.

1 **Supplemental material**

2 **Text S. Supplementary Information**

3

4 **Fig. S1. Construction of the T3SS machinery in strains lacking Bcr4 and/or BspR.** In

5 the *B. bronchiseptica* wild-type (upper left), the BspR negative regulation level for the *bsc*

6 locus transcription is moderate, and the T3SS machinery is established. In the Bcr4-deficient

7 strain (upper right), BspR strongly represses the *bsc* locus transcription, and construction of

8 the T3SS machinery is incomplete. In the BspR-deficient strain (lower left), the negative

9 regulatory effect of BspR is cancelled, and the construction of the T3SS machinery is

10 promoted. In the BspR/Bcr4 double-deficient strain (lower right), while the *bsc* locus

11 transcription is promoted because of BspR deficiency, T3SS is not functional.

12

13 **Fig. S2. Alignment of Bcr4 amino acid sequences in representative *Bordetella* species.**

14 Bcr4 amino acid sequences of *B. bronchiseptica* S798 (Bb), *B. pertussis* Tohama I (Bp) and

15 *B. parapertussis* 12822 (Bp) were compared using ClustalW. The grey highlighted letters

16 represent amino acid residues that were different from those in Bb. Bcr4 of Bp and Bpp have

17 98.3% and 97.1% identities with those of Bp, respectively.

18

19 **Fig. S3. The nonspecific reaction of anti-Bscl antibody to Bsp22.** The culture

20 supernatants (CS) were prepared from the wild-type strain,  $\Delta bsp22$  (Bsp22-deficient strain),

21  $\Delta bspR$  (BspR-deficient strain) or  $\Delta bspR\Delta bscI$  (BspR-complemented strain) cultured in SS  
22 medium. The CS samples were separated by SDS-PAGE and stained with Coomassie  
23 Brilliant Blue (CBB, left panel) or analyzed by Western blotting (WB) with anti-BscI antibody  
24 (right panel). NS indicates nonspecific signals. Experiments were performed at least three  
25 times, and representative data are shown.

26

27 **Fig. S4. The results of the RT-PCR analysis for the mRNA level of *bscI* in *B.***  
28 ***bronchiseptica* strains.** Total RNA was prepared from the wild-type strain,  $\Delta bspR$  (BspR-  
29 deficient strain) or  $\Delta bspR\Delta bcr4$  (BspR- and Bcr4-deficient strain) cultured in SS medium and  
30 subjected to a quantitative RT-PCR analysis. The histogram shows the relative amount of  
31 *bscI* mRNA normalized by the housekeeping gene, *recA* mRNA. Experiments were  
32 performed at least three times, and representative data are shown.

33

34 **Fig. S5. The results of the RT-PCR analysis for mRNA levels of *bopD* and *bscI* in the**  
35 **wild-type *B. bronchiseptica*.** Total RNA was prepared from the wild-type strain cultured in  
36 SS medium and subjected to a quantitative RT-PCR analysis. The histogram shows the  
37 relative amount of *bopD* and *bscI* mRNA in the wild-type. The relative ratio of *bscI* mRNA is  
38 shown when the *bopD* mRNA amount is set as 1. Experiments were performed at least three  
39 times, and representative data are shown.

40



41

42 **Fig. S6. The time course of BscI production in *B. bronchiseptica*.** The whole cell lysates  
43 (WCL) were prepared from the wild-type strain,  $\Delta bcr4$  (Bcr4-deficient strain),  $\Delta bspR$  (BspR-  
44 deficient strain) or  $\Delta bspR\Delta bcr4$  (BspR- and Bcr4-deficient strain) cultured in SS medium for  
45 0, 2, 5, 8 or 18 hr. The WCL were separated by SDS-PAGE and analyzed by Western blotting  
46 with antibodies against BscI, BopB and RpoB. Experiments were performed at least three  
47 times, and representative data are shown.

48

49 **Fig. S7. The predicted structural model of *B. bronchiseptica* Bcr4**

50 (A) The AlphaFold2 (AF2)-predicted structural model of *B. bronchiseptica* Bcr4 and  
51 structural comparison with *Aeromonas hydrophila* AcrH (PDB: 3WXX) and *Pseudomonas*  
52 *aeruginosa* PscG (PDB: 2UWJ). Z-score, root mean square deviation (RMSD), and amino  
53 acid identity (AA %ID) of AcrH and PscG compared with Bcr4 are shown, respectively. (B)  
54 The pairwise sequence alignment of Bcr4, AcrH, and PscG. The most frequent amino acid  
55 type is colored. The secondary structure assignments (H/h: helix, E/e: strand, L/l: coil) are  
56 also shown.

57

58

59

60

61 **Table S1. Nomenclature of the *Bordetella* T3SS component**

62

63 **Table S2. Plasmids used in the study**

64

65 **Table S3. Primers used in the study**

66

67

68

69

70

71

72

73

74

75

76

77

78

79

80

81

## **Supplementary Information**

82

### **SI Materials and Methods**

83

#### **Pull-down assay.**

84

The plasmids and primers used in this study are listed in Table S1 and S2, respectively.

85

In order to express *bscI*, *bscK*, *bscJ* or *bcr4* tagged with a V5 sequence at the respective C-

86

terminus (*bscI*-V5, *bscK*-V5, *bscJ*-V5 or *bcr4*-V5), we amplified DNA fragments encoding

87

the *bscI*, *bscK*, *bscJ* or *bcr4* genes with the primer sets of B1-*bscI*-V5 and B2-*bscI*-V5, B1-

88

*bscK*-V5 and B2-*bscK*-V5, B1-*bscJ*-V5 and B2-*bscJ*-V5 or B1-*bcr4*-comp and B2-*bcr4*-V5,

89

respectively, using *B. bronchiseptica* S798 genomic DNA as the template. Each resulting

90

PCR product was cloned into pDONR201 to obtain pMGKU404, pMGKU405, pMGKU406

91

or pMGKU407, respectively, by means of adapter PCR and site-specific recombination

92

techniques using the Gateway cloning system (Invitrogen). Each plasmid was mixed with an

93

expression vector such as p99*ccdB*-V5 (1) to obtain pMGKU408, pMGKU409, pMGKU410

94

or pMGKU411 using the Gateway cloning system.

95

BL21 cells carrying pMGKU408, pMGKU409 pMGKU410 or pMGKU411 were cultured

96

overnight at 37°C with shaking, and then diluted 1:40 in LB liquid medium containing 50

97

$\mu\text{L}/\text{mL}$  ampicillin and incubated for 2 h at 37°C with shaking. Each bacterial culture was

98

further incubated for 5 h at 30°C in the presence of isopropyl-beta-thiogalactopyranoside

99

(IPTG) at the final concentration of 1 mM. Bacteria were collected by centrifugation at

100

2,600 $\times g$  for 15 min, and suspended in cold TBS containing protease inhibitor cocktail,

101 cComplete (Roche). Each bacterial suspension was sonicated, and each supernatant was  
102 used for the pull-down assay.

103 Next, in order to purify Bcr4 or Bscl tagged with six histidine residues (6×His) at the  
104 respective N-terminus and Strep at the respective C-terminus, we amplified DNA fragments  
105 encoding *bcr4* or *bscl* with the primer sets of 5-HindIII-*bcr4* and 3-*bcr4*-Strep, or 5-HindIII-  
106 *bscl* and 3-*bscl*-Strep using *B. bronchiseptica* S798 genomic DNA as the template. Each  
107 amplified DNA fragment was used as a template for 2nd PCR with a primer set consisting  
108 of the upper primer used in the 1st PCR and 3-Strep-HindIII to add a 24 bp sequence  
109 encoding the Strep tag. Each resulting PCR product was cloned into the HindIII recognition  
110 sites of pColdII to obtain pMGKU412 or pMGKU413 by the In-Fusion Cloning System  
111 (Clontech), respectively. In order to purify Bcr4 lacking the amino acids region 58–109 or  
112 110–173, we amplified the DNA fragment with the primer sets of 5-*bcr4*-58-109-Strep-IF and  
113 3-IF-*bcr4*-58-109-Strep, or 5-*bcr4*-110-173-Strep-IF and 3-IF-*bcr4*-110-173-Strep using  
114 pColdII-*bcr4*-Strep as the template. Each amplified fragment was self-ligated by the In-  
115 Fusion Cloning System, respectively, and then designated pMGKU414 or pMGKU415.

116 BL21 cells carrying pMGKU412, pMGKU413, pColdII-*bteA*-N-Strep (2), pMGKU414 or  
117 pMGKU415 were cultured overnight at 37°C with shaking, and then diluted 1:100 in LB liquid  
118 medium containing 50  $\mu$ L/mL ampicillin and incubated for 2 h at 37°C with shaking,  
119 respectively. Each bacterial culture was further incubated overnight at 15°C in the presence  
120 of IPTG at the final concentration of 0.05 mM. Bacteria were collected by centrifugation at

121 2,600×g for 20 min, and suspended in cold TBS containing cComplete. Each bacterial  
122 suspension was sonicated and each supernatant except for that of pMGKU413 was  
123 subjected to purification using Ni-NTA agarose (Qiagen) according to the manufacturer's  
124 instructions. The purified proteins were dialyzed with TBS. As for pMGKU413, the bacterial  
125 suspension was sonicated and the pellet was suspended in Inclusion Body Solubilization  
126 Reagent (Thermo) according to the manufacturer's instructions. The BscI-Strep in  
127 solubilized solution was refolded as described previously (3). Briefly, the solubilized solution  
128 was diluted with 5-fold larger refolding buffer (20 mM Tris-HCl, pH-8, 150 mM NaCl, 10%  
129 glycerol) overnight at 4°C on a rotator, and then centrifugated at 20,000×g for 15 min. The  
130 supernatant was dialyzed with dialysis buffer (20 mM Tris-HCl, pH-8, 150 mM NaCl, 10%  
131 glycerol), and then centrifugated at 20,000×g for 15 min. The supernatant was used as  
132 purified protein for the pull-down assay.

133 We mixed the dual-tagged protein (6×His and Strep) and 30  $\mu$ l Strep-Tactin resin (IBA) in  
134 an Eppendorf tube and rotated the tube at 4°C for 1 h. Then, we washed the beads with  
135 TBS three times. Next, the V5-tagged protein-containing *E. coli* lysate was added to the tube  
136 and rotated at 4°C for 3 h. We transferred 30  $\mu$ L supernatant to new Eppendorf tube and  
137 added 30  $\mu$ L 2×SDS-PAGE sample buffer to prepare the Sup. Then we washed the beads  
138 with TBS (Fig. 1B and 1C) or TBS containing 0.1% Triton X-100 (Fig. 1C) three times and  
139 added 30  $\mu$ L 2×SDS-PAGE sample buffer to prepare the Pellet samples.

140

141 **Construction of a *bscI* gene disrupted or *bspR/bscI* double strains.**

142 To construct the *bscI* or *bspR/bscI* double mutants, a 2.4 kb DNA fragment encoding *bscI*  
143 and its flanking regions was amplified by PCR with primers B1-*bscI* and B2-*bscI* using *B.*  
144 *bronchiceptica* S798 genomic DNA as the template. The resulting PCR product was cloned  
145 into pDONR201 to obtain pMGKU416 using the Gateway cloning system. An inverse PCR  
146 was carried out with the primers R1-*bscI* and R2-*bscI* using circular pMGKU416 as the  
147 template. The resulting PCR product was self-ligated using the In-Fusion Cloning System to  
148 obtain pMGKU417. This plasmid contained a 369-bp in-frame deletion from 30 bp  
149 downstream of the 5' end of the *bscI* gene to 30 bp upstream of the 3' end of the gene. This  
150 plasmid, pMGKU417, was mixed with a positive suicide vector such as pABB-CRS2 (4) to  
151 obtain pMGKU418 using the Gateway cloning system. The pMGKU418 or pABB-CRS2-  
152 *bspR* (5) plasmids in turn were introduced into *E. coli* Sm10 $\lambda$ *pir*, and transconjugated into  
153 the S798 wild-type or  $\Delta$ *bscI* as described previously (6). The resulting mutant strains were  
154 designated  $\Delta$ *bscI* or  $\Delta$ *bspR $\Delta$ *bscI*, respectively.*

155

156 **Construction of plasmids used for producing Bcr4 derivatives and BscI**  
157 **complementation**

158 In order to produce full-length Bcr4 tagged with a FLAG sequence at the C-terminus, we  
159 performed an inverse PCR with primers of 5-*bcr4*-FLAG-IF and 3-IF-*bcr4*-FLAG using  
160 pDONR-*bcr4* (7) as the template. The resulting PCR product was self-ligated to obtain

161 pMGKU419 by the In-Fusion Cloning System. To produce Bcr4 lacking the amino acid  
162 regions 159–173, 164–173 or 169–173, inverse PCR was carried out with the primer sets of  
163 5-*bcr4*-FLAG-IF and 3-IF-*bcr4*Δ169-173-FLAG, 5-*bcr4*-FLAG-IF and 3-IF-*bcr4*Δ164-173-  
164 FLAG, or 5-*bcr4*-FLAG-IF and 3-IF-*bcr4*Δ159-173-FLAG using pMGKU419 as the template.  
165 Each amplified fragment was self-ligated by the In-Fusion Cloning System to obtain  
166 pMGKU420, pMGKU421 or pMGKU422, respectively. For BscI complementation, a PCR  
167 was carried out with the primers of B1-*bscI*-V5 and 3-B2-*bscI*-comp using *B. bronchiseptica*  
168 S798 genomic DNA as the template. The resulting PCR product was cloned into pDONR201  
169 to obtain pMGKU423 using the Gateway cloning system. These plasmids were mixed with  
170 pRK-R4-R3-F, pDONR-*phaP* and pDONR-*rrnB* (8) to obtain pMGKU424, pMGKU425,  
171 pMGKU426, pMGKU427 and pMGKU428 using the Gateway cloning system.

172

### 173 **Quantitative reverse transcription-PCR**

174 Total RNA was prepared from the *B. bronchiseptica* culture using a Trizol Max Bacterial RNA  
175 isolation Kit (Invitrogen), RNeasy Mini Kit (Qiagen), and RNase-free DNase Kit (Qiagen).  
176 The reverse transcription reaction was carried out using Transcriptor Universal cDNA Master  
177 (Roche) and T100 Thermal Cycler (Bio-Rad). The quantitative RT-PCR reaction was carried  
178 out using FastStart Essential DNA Probes Master (Roche) and Light Cycler 96 (Roche). To  
179 amplify the *bscI*, *bopD*, and *recA* genes, the primer sets 5-*bscI* and 3-*bscI*, 5-*bopD* and 3-  
180 *bopD*, 5-*recA* and 3-*recA* were used, respectively. For the experiment to determine the

181 presence of *bscI* mRNA in the *Bor4* mutant (Fig. S4), *recA* was used as an internal control.

182 The values obtained from each strain were standardized with *recA*, and the relative amounts

183 to the wild-type strain were determined. For the experiment to compare the amounts of *bscI*

184 and *bopD* mRNA in the wild-type (Fig. S5), we followed the protocol provided by Roche. The

185 genome of *B. bronchiseptica* was used as a template for quantitative RT-PCR to generate a

186 calibration curve. The relative amount of *bopD* mRNA to *bscI* mRNA was then determined

187 using the calibration curve.

188

## 189 **Protein structure prediction**

190 Protein structure prediction using amino acid sequences by AlphaFold2 with MMseqs2

191 (ColabFold) was performed on the Google Colab server with default parameters (9). A

192 structure-based protein homology search using AlphaFold2-predicted structural models was

193 performed on the Dali server (10). In addition, primary, secondary, and tertiary structures of

194 query proteins were visualized and compared with those of neighbors on the Dali server.

195

196

197

198

199

200



201

## References

- 202 1. Ogino T, Ohno R, Sekiya K, Kuwae A, Matsuzawa T, Nonaka T, Fukuda H, Imajoh-  
203 Ohmi S, Abe A. 2006. Assembly of the type III secretion apparatus of  
204 enteropathogenic *Escherichia coli*. *J Bacteriol* 188:2801-11.
- 205 2. Kuwae A, Momose F, Nagamatsu K, Suyama Y, Abe A. 2016. BteA Secreted from the  
206 *Bordetella bronchiseptica* Type III Secetion System Induces Necrosis through an  
207 Actin Cytoskeleton Signaling Pathway and Inhibits Phagocytosis by Macrophages.  
208 *PLoS One* 11:e0148387.
- 209 3. Halder PK, Roy C, Datta S. 2019. Structural and functional characterization of type  
210 three secretion system ATPase PscN and its regulator PscL from *Pseudomonas*  
211 *aeruginosa*. *Proteins* 87:276-288.
- 212 4. Sekiya K, Ohishi M, Ogino T, Tamano K, Sasakawa C, Abe A. 2001. Supermolecular  
213 structure of the enteropathogenic *Escherichia coli* type III secretion system and its  
214 direct interaction with the EspA-sheath-like structure. *Proc Natl Acad Sci U S A*  
215 98:11638-43.
- 216 5. Kurushima J, Kuwae A, Abe A. 2012. The type III secreted protein BspR regulates  
217 the virulence genes in *Bordetella bronchiseptica*. *PLoS One* 7:e38925.
- 218 6. Donnenberg MS, Kaper JB. 1991. Construction of an eae deletion mutant of  
219 enteropathogenic *Escherichia coli* by using a positive-selection suicide vector. *Infect*  
220 *Immun* 59:4310-7.

- 221 7. Nishimura R, Abe A, Sakuma Y, Kuwae A. 2018. *Bordetella bronchiseptica* Bcr4  
222 antagonizes the negative regulatory function of BspR via its role in type III secretion.  
223 Microbiol Immunol 62:743-754.
- 224 8. Kuwae A, Matsuzawa T, Ishikawa N, Abe H, Nonaka T, Fukuda H, Imajoh-Ohmi S,  
225 Abe A. 2006. BopC is a novel type III effector secreted by *Bordetella bronchiseptica*  
226 and has a critical role in type III-dependent necrotic cell death. J Biol Chem 281:6589-  
227 600.
- 228 9. Mirdita M, Schutze K, Moriwaki Y, Heo L, Ovchinnikov S, Steinegger M. 2022.  
229 ColabFold: making protein folding accessible to all. Nat Methods 19:679-682.
- 230 10. Holm L. 2020. Using Dali for Protein Structure Comparison. Methods Mol Biol  
231 2112:29-42.
- 232

| Unified name | <i>Bordetella</i> | <i>Yersinia</i> | <i>Pseudomonas</i> | Predicted function     |
|--------------|-------------------|-----------------|--------------------|------------------------|
| SctF         | BscF              | YscF            | PscF               | Needle                 |
| SctI         | Bscl              | Yscl            | Pscl               | Inner rod              |
| SctE         | BopB              | YopB            | PopB               | Translocation pore     |
| SctB         | BopD              | YopD            | PopD               | Translocation pore     |
| SctA         | Bsp22             | LcrV            | PcrV               | Needle tip or Filament |
| SctJ         | BscJ              | YscJ            | PscJ               | Inner membrane ring    |
| SctK         | BscK              | YscK            | PscK               | ATPase cofactor        |
| SctN         | BscN              | YscN            | PscN               | ATPase                 |

| Table S2. Plasmids used in the study |                                                                                                                 |                     |
|--------------------------------------|-----------------------------------------------------------------------------------------------------------------|---------------------|
| Name                                 | Description                                                                                                     | Reference or source |
| pDONR201                             | DNA cloning vector, Km <sup>r</sup>                                                                             | Invitrogen          |
| pMGKU404                             | pDONR201, <i>bscI</i> gene tagged with V5 sequence at the C terminus                                            | This study          |
| pMGKU405                             | pDONR201, <i>bscK</i> gene tagged with V5 sequence at the C terminus                                            | This study          |
| pMGKU406                             | pDONR201, <i>bscJ</i> gene tagged with V5 sequence at the C terminus                                            | This study          |
| pMGKU407                             | pDONR201, <i>bcr4</i> gene tagged with V5 sequence at the C terminus                                            | This study          |
| p99 <i>ccdB</i> -V5                  | Expression vector for V5 tagged gene, Amp <sup>r</sup>                                                          | 1                   |
| pMGKU408                             | p99- <i>ccdB</i> -V5, <i>bscI</i> gene tagged with V5 sequence at the C terminus                                | This study          |
| pMGKU409                             | p99- <i>ccdB</i> -V5, <i>bscK</i> gene tagged with V5 sequence at the C terminus                                | This study          |
| pMGKU410                             | p99- <i>ccdB</i> -V5, <i>bscJ</i> gene tagged with V5 sequence at the C terminus                                | This study          |
| pMGKU411                             | p99- <i>ccdB</i> -V5, <i>bcr4</i> gene tagged with V5 sequence at the C terminus                                | This study          |
| pColdIII                             | Expression vector for His tagged gene, Amp <sup>r</sup>                                                         | TAKARA              |
| pMGKU412                             | pColdIII, <i>bcr4</i> gene tagged with Strep sequence at the C terminus                                         | This study          |
| pMGKU413                             | pColdIII, <i>bscI</i> gene tagged with Strep sequence at the C terminus                                         | This study          |
| pMGKU414                             | pColdIII, <i>bcr4</i> gene lacking amino acids region 58-109 tagged with Strep sequence at the C terminus       | This study          |
| pMGKU415                             | pColdIII, <i>bcr4</i> gene lacking amino acids region 110-173 tagged with Strep sequence at the C terminus      | This study          |
| pColdII- <i>bteA</i> -N-Strep        | pColdIII, <i>bteA</i> gene coding amino acids region 1-312 tagged with Strep sequence at the C terminus         | 2                   |
| pMGKU416                             | pDONR201, <i>bscI</i> gene                                                                                      | This study          |
| pMGKU417                             | pDONR201, <i>bscI</i> gene containing internal sequence-deletion and its flanking region                        | This study          |
| pABB-CRS2                            | Suicide vector for conjugation, Amp <sup>r</sup>                                                                | 4                   |
| pMGKU418                             | pABB-CRS2, <i>bscI</i> gene containing internal sequence-deletion and its flanking region                       | This study          |
| pABB-CRS2- <i>bspR</i>               | pABB-CRS2, <i>bspR</i> gene containing internal sequence-deletion and its flanking region                       | 5                   |
| pDONR- <i>bcr4</i>                   | pDONR201, <i>bcr4</i> gene for complementation                                                                  | 7                   |
| pMGKU419                             | pDONR201, <i>bcr4</i> gene tagged with FLAG sequence at the C terminus for complementation                      | This study          |
| pMGKU420                             | pDONR201, <i>bcr4</i> gene lacking amino acids region 169-173 tagged with FLAG sequence at the C terminus       | This study          |
| pMGKU421                             | pDONR201, <i>bcr4</i> gene lacking amino acids region 164-173 tagged with FLAG sequence at the C terminus       | This study          |
| pMGKU422                             | pDONR201, <i>bcr4</i> gene lacking amino acids region 159-173 tagged with FLAG sequence at the C terminus       | This study          |
| pMGKU423                             | pDONR201, <i>bscI</i> gene for complementation                                                                  | This study          |
| pRK415-R4-R3-F                       | pRK415, recombination sites for MultiSite Gateway, Tet <sup>r</sup>                                             | 8                   |
| pDONR- <i>fhaP</i>                   | pDONR-P4-P1R, <i>fha</i> promoter                                                                               | 8                   |
| pDONR- <i>rrnB</i>                   | pDONR-P2R-P3, <i>rrnB</i> terminator                                                                            | 8                   |
| pMGKU424                             | pRK415-R4-R3-F, <i>bcr4</i> gene tagged with FLAG sequence at the C terminus for complementation                | This study          |
| pMGKU425                             | pRK415-R4-R3-F, <i>bcr4</i> gene lacking amino acids region 169-173 tagged with FLAG sequence at the C terminus | This study          |
| pMGKU426                             | pRK415-R4-R3-F, <i>bcr4</i> gene lacking amino acids region 164-173 tagged with FLAG sequence at the C terminus | This study          |
| pMGKU427                             | pRK415-R4-R3-F, <i>bcr4</i> gene lacking amino acids region 159-173 tagged with FLAG sequence at the C terminus | This study          |
| pMGKU428                             | pRK415-R4-R3-F, <i>bscI</i> gene                                                                                | This study          |

| Table S3. Primers used in the study |                                                |
|-------------------------------------|------------------------------------------------|
| Name                                | Sequence (5'→3')                               |
| B1-bscI-V5                          | AAAAAGCAGGCTTGTGGACAGCGGACCCGCC                |
| B2-bscI-V5                          | AGAAAGCTGGGTTTGACATTCTCGCCAGCGTGTG             |
| B1-bscK-V5                          | AAAAAGCAGGCTTGGCGCACGCGCTGGTCCCG               |
| B2-bscK-V5                          | AGAAAGCTGGGTTGGCTTGGGCGGGGAACGAGG              |
| B1-BscJ-V5                          | AAAAAGCAGGCTTGGAGTACGAGTTGGTGGGC               |
| B2-BscJ-V5                          | AGAAAGCTGGGTTGTCATGCCCGGCTCCTTCCG              |
| B1-bcr4-comp                        | AAAAAGCAGGCTGCCAGGTCCGGTCTCGCACCG              |
| B2-bcr4-V5                          | AGAAAGCTGGGTTTCCAGGAGCTCCAGGTAATG              |
| 5-HindIII-bcr4                      | ATCCGAATTCAAGCTTCATTCAGACTCAGGTTTCCAGATTC      |
| 3-bcr4-Strep                        | CGGGTGGCTCCATCCAGGAGCTCCAGGTAATG               |
| 5-HindIII-bscI                      | ATCCGAATTCAAGCTTAATTTGGATCTGACGGCGATC          |
| 3-bscI-Strep                        | CGGGTGGCTCCATGACATTCTCGCCAGCGTGTG              |
| 3-Strep-HindIII                     | GCAGGTGACAAGCTTTCATTTTTCGAACTGCGGGTGGCTCCA     |
| 5-bcr4-58-109-Strep-IF              | GCCGTGACGATCTGTCCGACTGGACGCCTGGTG              |
| 3-IF-bcr4-58-109-Strep              | CAGATCGCTGACGGCCGCCG                           |
| 5-bcr4-110-173-Strep-IF             | TGGAGCCACCCGCAGTTCGA                           |
| 3-IF-bcr4-110-173-Strep             | CTGCGGGTGGCTCCAGCGGTCTCCGCCTGTGCCG             |
| B1-bscI                             | AAAAAGCAGGCTTCATGACTGTTACGACGAC                |
| B2-bscI                             | AGAAAGCTGGGTGCACAGATCCAGCGCGACC                |
| R1-bscI                             | CGACGTTGGCGTTGATCGCCGTGATC                     |
| R2-bscI                             | TCAACGCCAACGTCGACACGCTGGCGAG                   |
| 5-bcr4-FLAG-IF                      | CCACCCGCAGTTTCAAAAATGAATTTGGATCTACCCAGCTTTCTTG |
| 3-IF-bcr4-FLAG                      | TCGAACTGCGGGTGGCTCCATCCAGGACCTCCAGGTAATGGCTCG  |
| 3-IF-bcr4 $\Delta$ 169-173-FLAG     | GTCATCCTTGTAGTCCAATGGCTCGGACTGCAACG            |
| 3-IF-bcr4 $\Delta$ 164-173-FLAG     | GTCATCCTTGTAGTCCAACGGCGCGGGCCGCATCATG          |
| 3-IF-bcr4 $\Delta$ 159-173-FLAG     | GTCATCCTTGTAGTCCATCATGGCGGGTCCGCTGTC           |
| 3-B2-bscI-comp                      | AGAAAGCTGGGTTTGACATTCTCGCCAGCGTGTG             |
| 5-bscI                              | CGATCTGCAGGCCAGGTT                             |
| 3-bscI                              | CTATTGCCTTGCCCAACAA                            |
| 5-bopD                              | CGGCTCGGTGAAGACATC                             |
| 3-bopD                              | CCTCCCGCATCTGTTGAC                             |
| 5-recA                              | ATGAAGATCGGCCTGATGT                            |
| 3-recA                              | TAGAACTTGAGCGCGTTGC                            |

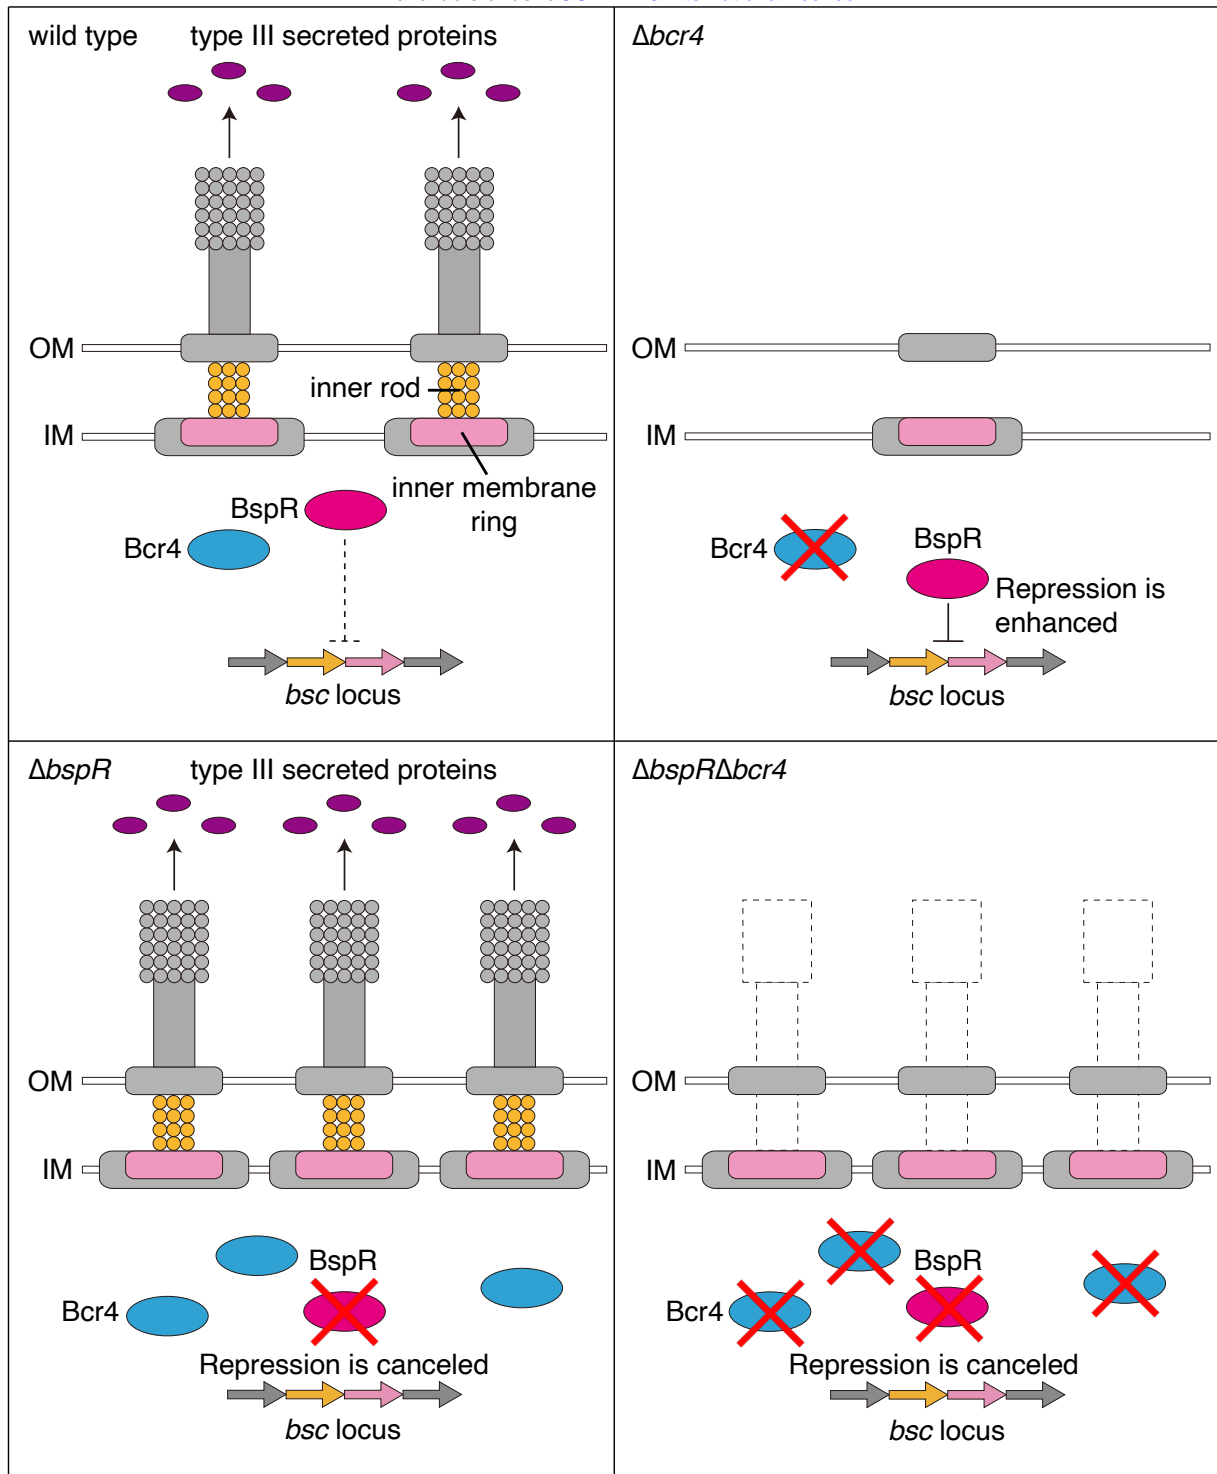

**Fig. S1. Construction of the T3SS machinery in strains lacking Bcr4 and/or BspR.** In the *B. bronchiseptica* wild-type (upper left), the BspR negative regulation level for the *bsc* locus transcription is moderate, and the T3SS machinery is established. In the Bcr4-deficient strain (upper right), BspR strongly represses the *bsc* locus transcription, and construction of the T3SS machinery is incomplete. In the BspR-deficient strain (lower left), the negative regulatory effect of BspR is cancelled, and the construction of the T3SS machinery is promoted. In the BspR/Bcr4 double-deficient strain (lower right), while the *bsc* locus transcription is promoted because of BspR deficiency, T3SS is not functional.

|     |     |                                                                |     |
|-----|-----|----------------------------------------------------------------|-----|
| Bb  | 1   | MHSDSGSDSGSDSGSGS--PMASSIHPSEPIQPMEHVLEEADARLLTEVGFLAAAVSDLT   | 58  |
| Bp  | 1   | MHSDSGSDSGSDSGSGS--PMVSSIHPSEPIQPMEHVLEEADARLLTEVGFLAAAVSDLT   | 58  |
| Bpp | 1   | MHSDSGSDSGSGSGSGSGSPMASSIHPSEPIQPMEHVLEEADARLLTEVGFLAAAVSDLT   | 60  |
| Bb  | 59  | RADAI FNALQRVRPGR TYPCIGLAVARMNAGLPDEAAEILANFQPAQAEDRSELDAWCGF | 118 |
| Bp  | 59  | RADAI FNALQRVRPGR THPCIGLAVARMNAGLPDEAAEILANFQPAQPEDRSELDAWCGF | 118 |
| Bpp | 61  | RADAI FNALQRVRPGR TYPCIGLAVARMNAGLPDEAAEVLANFQPAQAEDRSELDAWCGF | 120 |
| Bb  | 119 | ALLLAGRSDEARRMLQRAIDAGGEAARLAQVVLDSGPAMMRPAPLQSEPLPGAPG        | 173 |
| Bp  | 119 | ALLLAGRSDEARRMLQRAIDAGGEAARLAQVVLDSGPAMMRPAPLQSEPLPGAPG        | 173 |
| Bpp | 121 | ALLLAGRSDEARRMLQRAIDAGGEAARLAQVVLDSGPAMMRPAPLQSEPLPGAPG        | 175 |

**Fig. S2. Alignment of Bcr4 amino acid sequences in representative *Bordetella* species.** Bcr4 amino acid sequences of *B. bronchiseptica* S798 (Bb), *B. pertussis* Tohama I (Bp) and *B. parapertussis* 12822 (Bp) were compared using ClustalW. The grey highlighted letters represent amino acid residues that were different from those in Bb. Bcr4 of Bp and Bpp have 98.3% and 97.1% identities with those of Bp, respectively.

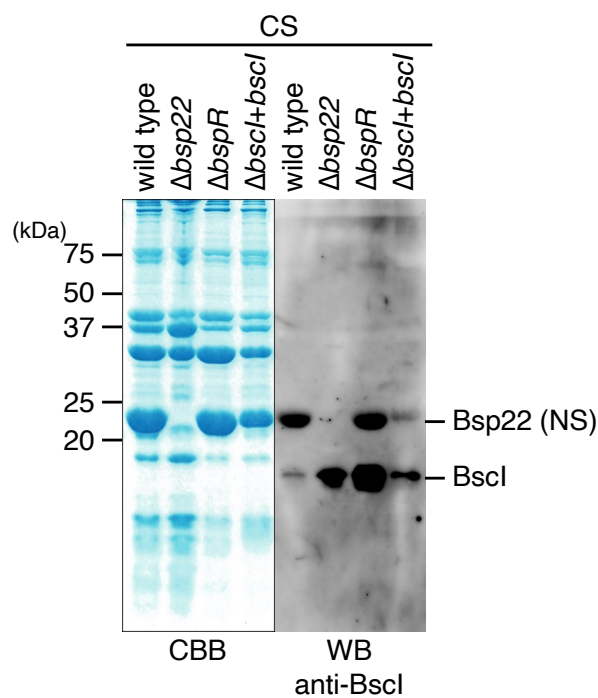

**Fig. S3. The nonspecific reaction of anti-BscI antibody to Bsp22.** The culture supernatants (CS) were prepared from the wild-type strain,  $\Delta bsp22$  (Bsp22-deficient strain),  $\Delta bspR$  (BspR-deficient strain) or  $\Delta bscI+bscI$  (BscI-complemented strain) cultured in SS medium. The CS samples were separated by SDS-PAGE and stained with Coomassie Brilliant Blue (CBB, left panel) or analyzed by Western blotting (WB) with anti-BscI antibody (right panel). NS indicates nonspecific signals. Experiments were performed at least three times, and representative data are shown.



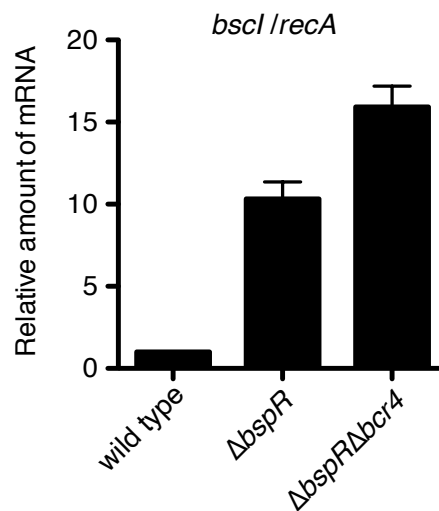

**Fig. S4. The results of the RT-PCR analysis for the mRNA level of *bscI* in *B. bronchiseptica* strains.** Total RNA was prepared from the wild-type strain, *ΔbspR* (BspR-deficient strain) or *ΔbspRΔbcr4* (BspR- and Bcr4-deficient strain) cultured in SS medium and subjected to a quantitative RT-PCR analysis. The histogram shows the relative amount of *bscI* mRNA normalized by the housekeeping gene, *recA* mRNA. Experiments were performed at least three times, and representative data are shown.

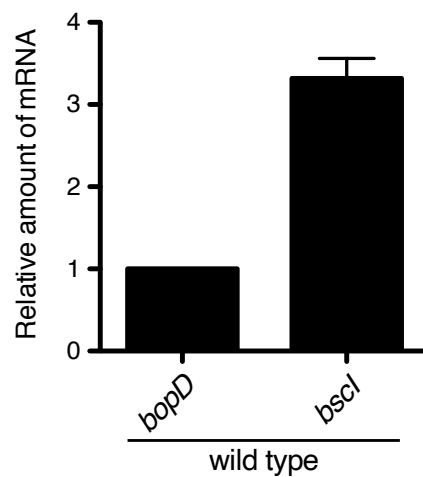

**Fig. S5. The results of the RT-PCR analysis for mRNA levels of *bopD* and *bscl* in the wild-type *B. bronchiseptica*.** Total RNA was prepared from the wild-type strain cultured in SS medium and subjected to a quantitative RT-PCR analysis. The histogram shows the relative amount of *bopD* and *bscl* mRNA in the wild-type. The relative ratio of *bscl* mRNA is shown when the *bopD* mRNA amount is set as 1. Experiments were performed at least three times, and representative data are shown.

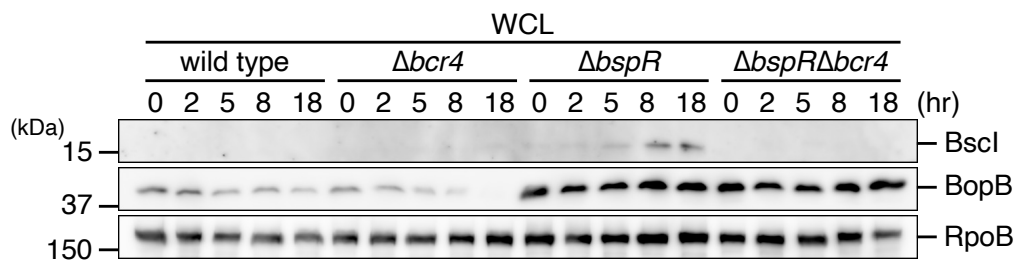

**Fig. S6. The time course of BscI production in *B. bronchiseptica*.** The whole cell lysates (WCL) were prepared from the wild-type strain,  $\Delta bcr4$  (Bcr4-deficient strain),  $\Delta bspR$  (BspR-deficient strain) or  $\Delta bspR\Delta bcr4$  (BspR- and Bcr4-deficient strain) cultured in SS medium for 0, 2, 5, 8 or 18 hr. The WCL were separated by SDS-PAGE and analyzed by Western blotting with antibodies against BscI, BopB and RpoB. Experiments were performed at least three times, and representative data are shown.

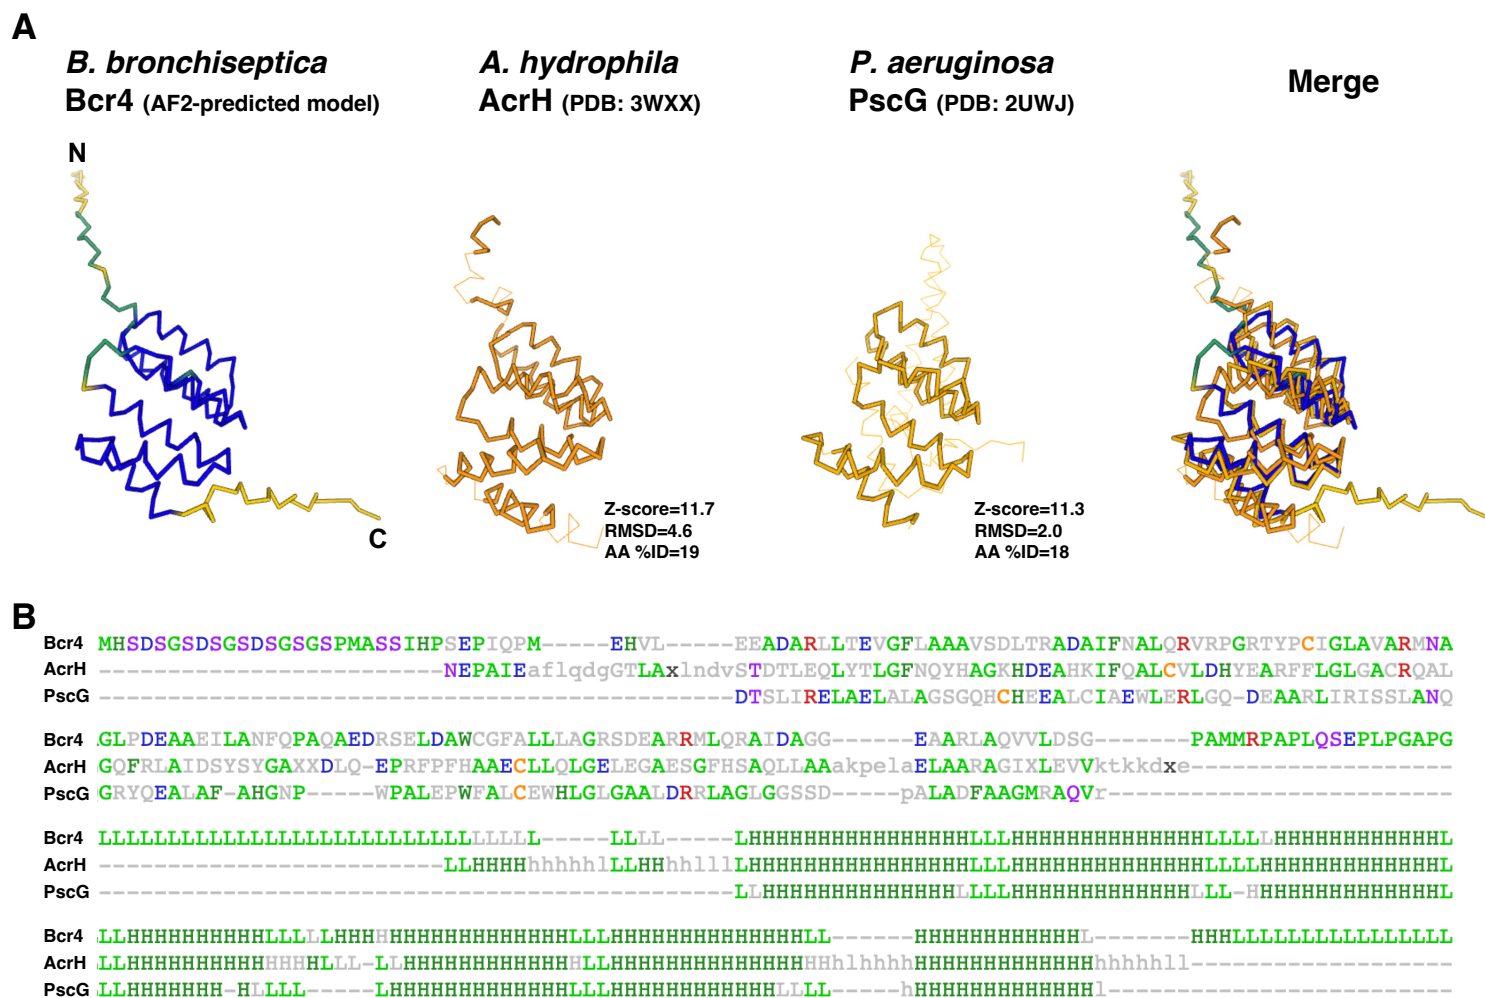

**Fig. S7. The predicted structural model of *B. bronchiseptica* Bcr4**

(A) The AlphaFold2 (AF2)-predicted structural model of *B. bronchiseptica* Bcr4 and structural comparison with *Aeromonas hydrophila* AcrH (PDB: 3WXX) and *Pseudomonas aeruginosa* PscG (PDB: 2UWJ). Z-score, root mean square deviation (RMSD), and amino acid identity (AA %ID) of AcrH and PscG compared with Bcr4 are shown, respectively. (B) The pairwise sequence alignment of Bcr4, AcrH, and PscG. The most frequent amino acid type is colored. The secondary structure assignments (H/h: helix, E/e: strand, L/l: coil) are also shown.
